1 **Complex evolutionary origins of specialized metabolite gene cluster diversity**  
2 **among the plant pathogenic fungi of the *Fusarium graminearum* species complex**

3  
4 Sabina Moser Tralamazza<sup>1,3,\*</sup>, Liliana Oliveira Rocha<sup>2</sup>, Ursula Oggenfuss<sup>3</sup>, Benedito Corrêa<sup>1</sup>, Daniel  
5 Croll<sup>3,\*</sup>

6  
7 <sup>1</sup> Department of Microbiology, Institute of Biomedical Sciences, University of São Paulo, São Paulo,  
8 Brazil.

9 <sup>2</sup> Department of Food Science, Food Engineering Faculty, University of Campinas, Av. Monteiro Lobato,  
10 80, Brazil

11 <sup>3</sup> Laboratory of Evolutionary Genetics, Institute of Biology, University of Neuchatel, Neuchâtel,  
12 Switzerland.

13  
14 \* Authors for correspondance: [sabina@usp.br](mailto:sabina@usp.br), [daniel.croll@unine.ch](mailto:daniel.croll@unine.ch)

15  
16  
17 Author contributions: SMT, LOR, BC and DC conceived the study; SMT, LOR and BC provided samples  
18 and datasets; SMT, UO analyzed the data; SMT and DC wrote the manuscript; LOR, UO and BC edited  
19 the manuscript

20  
21 Data availability: All raw sequence data was uploaded to the NCBI Short Read Archive (PRJNA542165).

22  
23 Keywords: head blight, wheat, fungus, pathogen, secondary metabolism

24

25 **Abstract**

26

27 Fungal genomes encode highly organized gene clusters that underlie the production of specialized (or

28 secondary) metabolites. Gene clusters encode key functions to exploit plant hosts or environmental niches.

29 Promiscuous exchange among species and frequent reconfigurations make gene clusters some of the most

30 dynamic elements of fungal genomes. Despite evidence for high diversity in gene cluster content among

31 closely related strains, the microevolutionary processes driving gene cluster gain, loss and

32 neofunctionalization are largely unknown. We analyzed the *Fusarium graminearum* species complex

33 (FGSC) composed of plant pathogens producing potent mycotoxins and causing Fusarium head blight on

34 cereals. We *de novo* assembled genomes of previously uncharacterized FGSC members (two strains of *F.*

35 *austroamericanum*, *F. cortaderiae* and *F. meridionale*). Our analyses of eight species of the FGSC in

36 addition to 15 other *Fusarium* species identified a pangenome of 54 gene clusters within FGSC. We found

37 that multiple independent losses were a key factor generating extant cluster diversity within the FGSC and

38 the *Fusarium* genus. We identified a modular gene cluster conserved among distantly related fungi, which

39 was likely reconfigured to encode different functions. We also found strong evidence that a rare cluster in

40 FGSC was gained through an ancient horizontal transfer between bacteria and fungi. Chromosomal

41 rearrangements underlying cluster loss were often complex and were likely facilitated by an enrichment in

42 specific transposable elements. Our findings identify important transitory stages in the birth and death

43 process of specialized metabolism gene clusters among very closely related species.

44

## 45 **Introduction**

46  
47 Fungal genomes encode highly organized structures that underlie the capacity to produce  
48 specialized (also called secondary) metabolites. The structures are composed of a tightly clustered group  
49 of non-homologous genes that in conjunction confer the enzymatic pathway to produce a specific  
50 metabolite (Osbourn, 2010). Specialized metabolites (SM) are not essential for the organism's survival but  
51 confer crucial benefits for niche adaptation and host exploitation. Specialized metabolites can promote  
52 defense (e.g penicillin), virulence (e.g trichothecenes) or resistance functions (e.g melanin) (Brakhage  
53 1998; Jansen et al. 2006; Nosanchuk and Casadevall 2006). Gene clusters are typically composed of two  
54 or more key genes in close physical proximity. The backbone gene encodes for the enzyme defining the  
55 class of the produced metabolite and the enzyme is most often a polyketide synthase (PKS), non-  
56 ribosomal peptides synthetase (NRPS), terpenes cyclase (TC) or a dimethylallyl tryptophan synthetase  
57 (DMATS). Additional genes in clusters encode functions to modify the main metabolite structure (e.g.  
58 methyltransferases, acetyltransferases and oxidoreductases), transcription factors involved in the cluster  
59 regulation and resistance genes that serve to detoxify the metabolite for the producer (Keller, Turner and  
60 Bennet, 2005). The modular nature of gene clusters favored promiscuous exchange among species and  
61 frequent reconfiguration of cluster functionalities (Rokas, Wisecaver and Lind, 2018).

62  
63 The broad availability of fungal genome sequences led to the discovery of a very large number of  
64 SM gene clusters (Brakhage, 2013). Yet, how gene clusters are formed or reconfigured to change function  
65 over evolutionary time remains poorly understood. The divergent distribution across species (Wisecaver,  
66 Slot and Rokas, 2014), frequent rearrangements (Rokas, Wisecaver and Lind, 2018) and high  
67 polymorphism within single species (Lind et al. 2017; Wolleberg et al. 2018) complicate the analyses of  
68 gene cluster evolution. Most studies analyzed deep evolutionary timescales and focused on the origins and  
69 loss of major gene clusters (Wisecaver et al. 2014). Gene clusters often emerged through rearrangement or  
70 duplications of native genes (Wong and Wolfe 2005; Slot and Rokas 2010; Wisecaver et al. 2014). The

71 DAL gene cluster involved in the allantoin metabolism is a clear example of this mechanism. The cluster  
72 was formed from the duplication of two genes and relocation of four native genes in the yeast  
73 *Saccharomyces cerevisiae* (Wong and Wolfe 2005). Gene clusters can also arise in species from horizontal  
74 gene transfer events (Kaldhi et al. 2008, Khaldi and Wolfe 2011; Campbell et al. 2012; Slot and Rokas  
75 2012). For example, the complete and functional gene cluster underlying the production of the aflatoxin  
76 precursor sterigmatocystin was horizontal transferred from *Aspergillus* to the unrelated *Podospora*  
77 *anserine* fungus (Slot and Rokas 2011). Five gene clusters underlying the hallucinogenic psilocybin  
78 production were horizontally transmitted among the distantly related fungi *Psilocybe cyaneus*,  
79 *Gymnopilus dilepis* and *Panaeolus cyaneus* (Reynolds et al. 2018). The horizontal transfer was likely  
80 favored by the overlapping ecological niche of the involved species.

81 Despite evidence for high diversity in gene cluster content among closely related strains  
82 (Wiemman et al. 2013), the microevolutionary processes driving gene cluster gain, loss and  
83 neofunctionalization are largely unknown. Closely related species or species complexes encoding diverse  
84 gene clusters are ideal models to reconstruct transitory steps in the evolution of gene clusters. The  
85 *Fusarium graminearum* species complex (FGSC) is composed of a series of plant pathogens capable to  
86 produce potent mycotoxins and cause the Fusarium head blight disease in cereals. The species complex  
87 was originally described as a single species. Based on genealogical concordance phylogenetic species  
88 recognition, members of *F. graminearum* were expanded into a species complex (O'Donnel et al. 2004).  
89 Currently, the complex includes at least 16 distinct species that vary in aggressiveness, growth rate, and  
90 geographical distribution but lack morphological differentiation (Aoki et al. 2012; Ward et al. 2008; Puri  
91 and Zhong 2010; Zhang et al. 2012). The genome of *F. graminearum* sensu stricto, the dominant species  
92 of the complex, was extensively characterized for the presence of SM gene clusters (Aoki et al. 2012;  
93 Wiemman et al. 2013; Proctor et al. 2018; Hoogendoorn et al. 2018). Based on genomics and  
94 transcriptomics analyses, Sieber et al. (2014) characterized a large number of clusters with a potential to  
95 contribute to virulence and identified likely horizontal gene transfer events.

96           However, the species complex harbors several other economically relevant species with largely  
97 unknown SM production potential (van der Lee et al. 2015). Diversity in metabolic capabilities within the  
98 FGSC extends to production of the potent mycotoxin trichothecene. The biosynthesis of some  
99 trichothecene variant forms (15-acetyldeoxyvalenol, 3-acetyldeoxynivalenol and nivalenol) are species-  
100 specific and associated with pathogenicity (Desjardins et al 2006). Comparative genomics analyses of  
101 three species of the complex (*F. graminearum* s.s, *F. asiaticum*, *F. meridionale*) identified species-specific  
102 genes associated with the biosynthesis of metabolites (e.g. PKS40 in *F. asiaticum*) (Walkowiak et al.  
103 2016). Most species were not analyzed at the genome level for SM production potential or lack an  
104 assembled genome altogether.

105           In this study, we aimed to characterize exhaustively the metabolic potential of the FGSC based on  
106 comparative genomics analyses and reconstruct the evolutionary processes governing the birth and death  
107 process of gene clusters among the recently emerged species. For this, we sequenced and assembled  
108 genomes for *F. meridionale*, *F. cortaderiae* and two strains of *F. austroamericanum* - four genomes of the  
109 most frequent members of the FGSC found in Brazilian wheat grains, after the well-characterized *F.*  
110 *graminearum* s.s. In total, we analyzed 11 genomes from 8 distinct species within the FGSC. We  
111 identified 54 SM gene clusters in the pangenome of the FGSC including two gene clusters not yet known  
112 from the complex. The variability in SM gene clusters was generated by multiple independent losses,  
113 horizontal gene transfer and chromosomal rearrangements that produced novel gene cluster  
114 configurations.

115

116

117

## 118 **Material and Methods**

119

### 120 **Strains, DNA preparation and sequencing**

121 The fungal strains (*F. meridionale* – Fmer152; *F. cortaderiae* – Fcor153; *F. austroamericanum* –  
122 Faus151 and Faus154) were isolated from healthy and freshly harvested wheat grains from three different  
123 regions of Brazil, São Paulo State (Fmer152 and Faus151), Parana State (Fcor153) and Rio Grande do Sul  
124 State (Faus154) (Tralamazza, et al. 2016). The DNA extraction was performed using a DNAeasy kit  
125 (Qiagen, Hilden, Germany) according to the manufacturer's instructions. DNA quality was analyzed using  
126 a NanoDrop2000 (Thermo-Fisher Scientific, USA) and Qubit (Thermo-Fisher Scientific) was used for  
127 DNA quantification (minimal DNA concentration of 50 ng/  $\mu$ L). Nextera Mate Pair Sample Preparation  
128 kit (Illumina Inc.) was used for DNA Illumina library preparation. Samples were sequenced using 75 bp  
129 reads from paired-end libraries on a NextSeq500 v2 (Illumina Inc.) by the Idengene Inc. (Sao Paulo,  
130 Brazil). The software FastQC v. 0.11.7 (Andrews 2010) was used for quality control of the raw sequence  
131 reads. To perform phylogenomic analyses, whole genome sequences of *Fusarium* species and  
132 *Trichoderma reesei* (as an outgroup) were retrieved from public databases (see Supplementary Table S1  
133 for accession numbers).

134

### 135 **Genome assembly**

136 *De novo* genome assembly was performed for the four newly sequenced genomes of the FGSC (*F.*  
137 *meridionale* – Fmer152; *F. cortaderiae* – Fcor153; *F. austroamericanum* – Faus151 and Faus154) and for  
138 the publicly available 150 bp paired-end raw sequence data for *F. boothi*, *F. gerlachii* and *F. louisianense*  
139 (Supplementary Table S1). We used the software Spades v.3.12.0 (Bankevich et al. 2012) to assemble  
140 Illumina short read data to scaffolds using the “careful” option to reduce mismatches. We selected the k-  
141 mer series “21,33,45,67” for *F. meridionale*, *F. cortaderiae* and *F. austroamericanum* sequences, and  
142 “21,33,55,77,99,127” for *F. boothi*, *F. gerlachii* and *F. louisianense*. The maximum k-mer values were  
143 adjusted according to available read length. For all other genomes included in the study (including *F.*

144 *asiaticum* and *F. graminearum* s.s), assembled scaffolds were retrieved from NCBI or Ensembl database  
145 (Supplementary Table S1). The quality of draft genome assemblies was assessed using QUAST v.4.6.3  
146 (Gurevich et al. 2013). BUSCO v.3 (Waterhouse et al. 2017) was used to assess the completeness of core  
147 fungal orthologs based on a fungal BUSCO database.

148

### 149 **Gene prediction and annotation**

150 Genes were predicted using Augustus v.2.5.5 (Stanke and Morgenstern 2005). We used the pre-  
151 trained gene prediction database for the *F. graminearum* s.s genome as provided by the Augustus  
152 distribution for all annotations and used default parameters otherwise. Predicted proteomes were annotated  
153 using InterProScan v.5.19 (Joonas et al. 2014) identifying conserved protein domains and gene ontology.  
154 Secreted proteins were defined according to the absence of transmembrane domains and the presence of a  
155 signal peptide based on Phobius v.1.01 (Kall et al. 2004), SignalP v.4.1 (Petersen et al. 2011) and  
156 TMHMM v.2.0 (Krog et al. 2001) concordant results. We identified the predicted secretome with a  
157 machine learning approach implemented in EffectorP v2.0 (Sperschneider et al. 2018).

158

### 159 **Genome alignment and phylogenomic analyses**

160 For the phylogenomic analyses, we used OrthoMCL (Li et al. 2003) to identify single copy  
161 orthologs conserved among all strains. High accuracy alignment of orthologous sequences was performed  
162 using MAFFT v.7.3 (Kato et al. 2017) with parameters --maxiterate 1000 --localpair. To construct a  
163 maximum-likelihood phylogenetic tree for each alignment, we used RAxML v.8.2.12 (Stamatakis 2014)  
164 with parameters -m PROTGAMMAAUTO and bootstrap of 100 replicates). The whole-genome  
165 phylogeny tree was constructed using Astral III v.5.1.1 (Zhang et al. 2017) which uses the multi-species  
166 coalescent model and estimates a species tree given a set of unrooted gene trees. We used Figtree v.1.4.0  
167 for visualization of phylogenetic trees (Rambaut 2012).

168

### 169 **Specialized metabolite gene cluster prediction**

170 To retrieve specialized metabolite (SM) gene clusters from genome assemblies, we performed  
171 analyses using antiSMASH v.3.0 (Blin et al. 2017) and matched predicted gene clusters with functional  
172 predictions based on InterProScan v. 5.29-68 (Jones et al. 2014). For the *F. graminearum* reference  
173 genome (FgramR), we retrieved SM gene clusters identified in a previous study, which used evidence  
174 from multiple prediction tools and incorporated expression data (Sieber et al. 2014). We selected only  
175 clusters with a defined class/function, identified backbone gene and annotated cluster size. We made an  
176 exception for cluster SM45, which was predicted by antiSMASH but not characterized by Sieber et al.  
177 (2014) likely due to discrepancies in gene annotation.

178

### 179 **Pangenome SM gene cluster map and synteny analysis**

180 We constructed a pangenome of SM gene clusters in the FGSC by mapping the backbone genes of  
181 each distinct cluster against all other genomes. BLAST+ v.2.8 (Camacho et al. 2009) local alignment  
182 search (blastp with default parameters) was performed and matches with the highest bitscores were  
183 retrieved. For each unique cluster in FGSC, we selected the backbone gene of a specific genome as a  
184 reference for presence/absence analyses within the complex. We used FgramR backbone sequences for the  
185 majority of the clusters (clusters SM1-SM45), for SM46 we used FasirR2, for SM47-SM52 FasiR, for  
186 SM53 we used Fcor153 and for SM54 we used Faus154 (Supplementary Table S3). We considered a gene  
187 cluster as present if the blastp identity of the backbone gene was above 90% (threshold for FGSC  
188 members). For strains outside of the FGSC (*i.e.* all other *Fusarium* species), we used a cut-off of 70%.  
189 Heatmaps were drawn using the R package ggplot2 (Wickham 2016) and syntenic regions of the gene  
190 clusters were drawn using the R package genoplots (Guy et al. 2010). For SMGC with taxonomical  
191 distribution mismatching the species phylogeny, we performed additional phylogenetic analyses. For this,  
192 we queried each encoded protein of a cluster in the NCBI protein database (see Supplementary Table S2  
193 for accession numbers). We reconstructed the most likely evolutionary history of a gene cluster using the  
194 maximum likelihood method based on the JTT matrix-based amino acid substitution model (Jones et al.



195 1992). We performed 1000 bootstrap replicates and performed all analyses using the software MEGA  
196 v.7.0.26 (Kumar et al. 2016).

### 197 **Repetitive elements annotation**

198 We performed *de novo* repetitive element identification of the complete genome of *F.*  
199 *graminearum* (FgramR) using RepeatModeler 1.0.11 (Smit and Hubley 2008). We identified conserved  
200 domains of the coding region of the transposable elements using blastx and the non-redundant NCBI  
201 protein database. One predicted transposable element family was excluded due to the high sequence  
202 similarity to a major facilitator superfamily gene and low copy number ( $n = 2$ ), which strongly suggests  
203 that a duplicated gene was misidentified as a transposable element. We then annotated the repetitive  
204 elements with RepeatMasker v.4.0.7 (Smith et al. 2015). One predicted transposable element family  
205 (element 4-family1242) showed extreme length polymorphism between the individual insertions and no  
206 clearly identifiable conservation among all copies. The consensus sequence of family1242 also contained  
207 several large poly-A islands, tandem repeats and palindromes. Using blastn, we mapped the sequences of  
208 all predicted insertions against the consensus sequence and identified five distinct regions with low  
209 sequence similarity between them. We created new consensus sequences for each of these five regions  
210 based on the genomes of *F. graminearum* and *F. austroamericanum* (Faus154) (Morgulis et al. 2008;  
211 Zhang et al. 2000). We filtered all retrieved sequences for identity >80% and >80% alignment length. We  
212 added flanking sequences of 3000 bp and visually inspected all retrieved hits with Dotter v.3.1  
213 (Sonnhammer and Durbin 1995). Then, we performed a multiple sequence alignment using Clustalw  
214 (Altschul et al. 1997; Higgins and Sharp 1988) to create new consensus sequences. Finally, we replaced  
215 the erroneous element 4-family 1242 with the five identified sub-regions. We used the modified repeat  
216 element library jointly with the Dfam and Repbase database to annotate all genomes using RepeatMasker  
217 (Smit et al. 2008). Transposable element locations in the genome were visualized with the R package  
218 genoPlotR v0.8.9 (Guy et al. 2011). We performed transposable element density analyses of the genomes  
219 in 10 kb windows using bedtools v.2.27 (Quinlan and Hall 2010).

220

## 221 **Results**

222

### 223 **Genomic sampling of the *Fusarium graminearum* species complex**

224 We analyzed genomes of 11 strains of 8 different species of the FGSC in order to resolve species  
225 relationships and detect divergence in their specialized metabolism. We performed the first *de novo*  
226 assembly and genome annotation for two strains of *F. austroamericanum* (Faus151 and Faus154), a strain  
227 of *F. cortaderiae* (Fcor153) and a strain of *F. meridionale* (Fmer152). We included 15 other species of the  
228 *Fusarium* genus including the *Fusarium fujikuroi* species complex (FFSC) and the *Fusarium sambucinum*  
229 species complex (FSAMSC) to distinguish between gene gains and losses. We first assessed the genome  
230 assembly quality within FGSC (Supplementary Table S1). N50 values of the newly sequenced genomes  
231 ranged from 220-442 kb. The N50 of previously sequenced genomes of the FGSC ranged from 149-9395  
232 kb including the fully finished assembly of the reference genome *F. graminearum* PH-1 (FgramR). By  
233 analyzing the completeness of all assemblies, we found the percentage of recovered BUSCO orthologues  
234 to be above 99.3% for all FGSC members. The genome sizes within the FGSC ranged from 35.02 – 38.0  
235 Mbp. All genomes shared a similar GC content (47.84 – 48.39%) and number of predicted genes (11'484-  
236 11'985) excluding the reference genome. The *F. graminearum* reference genome showed a higher number  
237 of predicted genes (14'145) most likely due to the completeness of the assembly and different gene  
238 annotation procedures. The percentage of repetitive elements in the genome varied from 0.47 – 4.85%  
239 among members of the *Fusarium* genus with a range of 0.97 – 1.99% within the FGSC. Genomes of  
240 strains falling outside of the FGSC showed N50 values and a BUSCO recovery of 31–9395 kb and 93–  
241 100%, respectively.

242

### 243 **Phylogenomic reconstruction**

244 We analyzed the phylogenetic relationships of eight distinct species within the FGSC and 15  
245 additional members of *Fusarium*. We included *Trichoderma reesei* as an outgroup species. Using  
246 OrthoMCL, we identified 4191 single-copy orthologs conserved in all strains and used these to generate a

247 maximum likelihood phylogenomic tree (Figure 1). The three species complexes included in our analyses  
248 (FFSC, FSAMSC and FGSC) were clearly differentiated with high bootstrap support (100%). All FGSC  
249 members clustered as a monophyletic group and *F. culmorum* was the closest species outside of the  
250 complex. The cluster of *F. graminearum*, *F. boothi*, *F. gerlachii* and *F. louisianense*, as well *F.*  
251 *cortaderiae*, *F. austroamericanum* and *F. meridionale* each formed well-supported clades. The FGSC  
252 species clustered together consistent with previous multi-locus phylogenetic studies based on 11 combined  
253 genes (Aoki et al. 2012) apart from *F. asiaticum* clade that was found separated from the clade of *F.*  
254 *graminearum*, *F. boothi*, *F. gerlachii* and *F. louisianense*. The tree clearly resolves the FSAMSC as a  
255 monophyletic group, which includes *F. culmorum*, *F. pseudograminearum*, *F. langsethiae*, *F. poae* and *F.*  
256 *sambucinum*, together with all members of the FGSC. The members of the FFSC (*F. fujikuroi*, *F.*  
257 *verticillioides*, *F. bulbicola*, *F. proliferatum* and *F. mangiferae*) also formed a monophyletic group.

258

### 259 **Specialized metabolite gene clusters diversity in the FGSC**

260 We analyzed all genome assemblies for evidence of SM gene clusters based on physical clustering  
261 and homology-based inference of encoded functions. Out of 54 SM gene cluster within the FGSC, seven  
262 were absent from the *F. graminearum* reference (Figure 2). The class of NRPS was the most frequent SM  
263 gene cluster category ( $n = 19$ ), followed by PKS ( $n = 13$ ) and TPS ( $n = 11$ ). We also found several cases  
264 of hybrid clusters, containing more than one class of backbone gene (Figure 2). We found substantial  
265 variation in the presence or absence of SM gene clusters within the FGSC and among *Fusarium* species in  
266 general. We classified gene clusters into three distinct categories based on the phylogenetic conservation  
267 of the backbone gene in FGSC (Figure 2). Out of the 54 clusters, 43 SM gene clusters were common to all  
268 FGSC members (category 1; Figure 2). The SM gene clusters shared within the species complex were  
269 usually also found in the heterothallic species *F. culmorum* (86.4% of all clusters) and in *F.*  
270 *pseudograminearum* (79.7% of all clusters), the most closely related species outside of the FGSC (Figure  
271 1). The gene cluster responsible for the production of the metabolite gramillin was shared among all  
272 FGSC species and *F. culmorum* (Figure 2). We found five SM gene clusters (SM22, SM43, SM45 and

273 SM48) that were not shared by all FGSC members but present in more than 20% of the strains (category  
274 2; Figure 2). Six SM gene clusters (SM46, SM50, SM51, SM52, SM53 and SM54) were rare within the  
275 FGSC or even unique to one analyzed genome (category 3; Figure 2). We also found 13 highly conserved  
276 SM gene clusters among members of the *Fusarium* genus with 24 of the 26 analyzed genomes encoding  
277 the backbone gene (>70% amino acid identity; Supplementary Table S3). An example of such a conserved  
278 cluster is SM8 underlying the production of the siderophore triacetylfusarine, which facilitates iron  
279 acquisition both in fungi and bacteria (Charlang et al. 1981).

280

### 281 **Multiple gene cluster rearrangements and losses within the FGSC**

282 We analyzed the mechanisms underlying gene cluster presence-absence polymorphism within the  
283 FGSC (category 2 and 3; Figure 2). These clusters were encoding the machinery for the production of  
284 both known and uncharacterized metabolites. We considered a gene cluster to be lost if at least the  
285 backbone gene was missing or suffered pseudogenization. Both, SM45, underlying siderophore  
286 production, and SM33, a PKS cluster, were shared among all FGSC members except *F. asiaticum* (FasiR).  
287 The cluster of fusaristatin A (SM40), a metabolite with antibiotic activities and expression associated with  
288 infection in wheat (Sieber et al. 2014) was another example of cluster loss in a single species, *F.*  
289 *cortaderiae* (Fcor153). We found that the cluster encoding for the production of the metabolite guaia,6-  
290 10(14)-diene (SM43) is conserved in different species within FGSC but the cluster suffered independent  
291 losses in *Fusarium*. The TPS class gene cluster identified in *F. fujikuroi* (Burkhardt et al. 2016) was  
292 shared among different species complexes (FFSC and FSAMSC; Figure 3). In the FFSC, the species *F.*  
293 *fujikuroi*, *F. proliferatum*, *F. bulbicola* and *F. mangiferae* share the cluster. In the FSAMSC, the parent  
294 complex that includes also FGSC, the guaia,6-10(14)-diene cluster was found to be rearranged compared  
295 to the cluster variant found in the FFSC. Gene cluster synteny analyses among strains within the FGSC  
296 showed that several members (*F. cortaderiae*, *F. austroamericanum*, *F. meridionale* and *F. louisianense*)  
297 lost two segments of the cluster. The gene cluster variant with partial deletions retained only the gene  
298 encoding for the biosynthesis of pyoverdine and the genes flanking the cluster (Figure 3). To retrace the

299 evolutionary origins of the guaia, 6-10(14)-diene cluster, we performed a phylogenetic analysis of each  
300 gene within the cluster. The backbone gene encoding for the terpene synthase and the pyoverdine  
301 biosynthesis genes show congruent phylogenetic relationships. However, the gene phylogenies showed  
302 discrepancies compared to the species tree (Supplementary Figure S1). Both gene trees showed that  
303 orthologs found within the FGSC grouped with species outside of the complex. *F. graminearum* and *F.*  
304 *gerlachii* formed a subclade with the sister species *F. culmorum* as did *F. asiaticum* with the FSAMSC  
305 species *F. pseudograminearum*.

306  
307 We found the cluster underlying the apicidin metabolite production (SM46) present within the  
308 FGSC (Figure 4). The cluster was first discovered in *F. incarnatum* (former *F. semitectum*; Jin et al. 2010)  
309 and was found to underlie the production of metabolites with antiparasitic properties (Darkyn-Ratway et  
310 al. 1996). Our analysis showed that the cluster suffered multiple independent losses across the *Fusarium*  
311 genus including a near complete loss within the FGSC, except in the strain of *F. asiaticum* (FasiR2),  
312 which shares a complete and syntenic cluster with the distantly related species *F. incarnatum* and *F.*  
313 *langsethiae*. Surprisingly, the *F. asiaticum* strain FasiR maintained only a pseudogenized NRPS backbone  
314 gene and the flanking genes on one end of the cluster. *F. fujikuroi* is missing *aps10* encoding a  
315 ketoreductase and is known to produce a similar metabolite called apicidin F (Niehaus et al. 2014). We  
316 performed a phylogenetic analysis of the genes *aps1* encoding an NRPS, *aps5* encoding a transcription  
317 factor, *aps10* and *aps11* encoding a fatty acid synthase to investigate a scenario of horizontal gene  
318 transfer. Both the individual gene trees and a concatenated tree (with *aps1*, *aps5* and *aps11*) showed that  
319 the genes follow the species tree phylogeny except for *F. avenaceum* (Figure 4). The phylogeny of *aps10*  
320 included a homologous gene of *F. acuminatum*, which together with *F. avenaceum*, is part of the  
321 *Fusarium tricinctum* species complex. The phylogeny of *aps10* diverged from the species tree. An  
322 analysis of gene cluster synteny showed that the *F. avenaceum* gene cluster is missing the gene *aps9* and  
323 underwent a drastic gene order rearrangement compared to the other species. The rearrangement and  
324 divergency may be the consequence of a partial gene cluster duplication and may have led to a

325 neofunctionalization of the gene cluster in *F. avenaceum*. The sequence rearrangement in the apicidin  
326 gene cluster and the discontinuous taxonomic distribution is suggestive of a horizontal gene transfer event  
327 from *F. langsethiae* to *F. asiaticum*. However, multiple independent losses across the *Fusarium* genus  
328 combined with a possible advantage to maintain the cluster in the *F. asiaticum* strain FasiR2 could explain  
329 the observed patterns as well (Figure 4).

330

### 331 **A secondary gene cluster is linked to multiple horizontal gene transfers events**

332 We found evidence for a horizontal transfer of six genes among fungi and a single bacterial  
333 transfer event in the formation of the SM54 gene cluster. The rare cluster (category 3), with a predicted  
334 size of 11 genes, was found in the FGSC strain *F. austroamericanum* (Faus154). Across *Fusarium*  
335 species, six genes of the cluster are shared with *F. avenaceum* (Figure 5). Of the six genes, the backbone  
336 gene encoding the PKS, a cytochrome P450 and a methyltransferase gene share homology with the genes  
337 *fdsS*, *fdsH* and *fdsD*, respectively, constituting the Fusaridione A cluster in *F. heterosporum*. A homology  
338 search of the genes shared between *F. austroamericanum* and *F. avenaceum* showed *F. avenaceum* to be  
339 the only hit with a high percentage of identity (>80%) to the analyzed genes (Supplementary Table S4).  
340 The phylogenetic analyses of the six genes, consistently grouped *F. austroamericanum* with *F.*  
341 *avenaceum*. This clustering was conserved if the tree included also orthologs found in *F. heterosporum*,  
342 which is a species more closely related to *F. avenaceum* than *F. austroamericanum* (Figure 5). The  
343 phylogenetic distribution of the gene cluster and high homology strongly suggest that at least a segment of  
344 the cluster was horizontally transferred from the *F. avenaceum* lineage to *F. austroamericanum* to create  
345 the SM54 gene cluster.

346

347 Interestingly, a second gene of the SM54 cluster (Faus154\_g659), encoding a NAD(P)/FAD-  
348 binding protein was gained most likely through horizontal transfer from bacteria. A homology search  
349 identified a homolog in the Actinobacteria *Streptomyces antibioticus* with 44.3% identity and 56.8%

350 similarity followed by several other *Streptomyces* spp. strains as the next best hits (Supplementary Table  
351 S4). The homologs in *F. austroamericanum* and *S. antibioticus* share the same NAD(P)/FAD-binding  
352 domains (Supplementary Figure S2). Among fungi, hits to the *F. austroamericanum* homolog were of  
353 lower percentage identity, the best hit was found in the ascomycete *Aspergillus wentii* with 40.6% identity  
354 (Supplementary Table S4). Hence, this suggests a more recent horizontal transfer event between an  
355 ancestor of *Streptomyces* and *Aspergillus*. The lack of close orthologues of Faus154\_g659 in other fungi  
356 of the same class (Sordariomycetes) and the amino acid and functional homology found in bacteria,  
357 suggested an ancient bacterial origin of this gene via a horizontal transfer event.

358

### 359 **Gene cluster reconfiguration across diverse fungi**

360 The cluster SM53 is shared among two FGSC strains, *F. cortaderiae* (strain Fcor153) and *F.*  
361 *austroamericanum* (strain Faus151). In the second *F. austroamericanum* strain (Faus154), the cluster is  
362 missing most genes and suffered pseudogenization (Figure 6). We conducted a broad homology search  
363 across fungi and found SM53 to be present in *F. bulbicola*, which is not a member of the FGSC. In *F.*  
364 *bulbicola*, the core gene set clusters with at least six additional genes that are typically associated with a  
365 fumonisin gene cluster including a cytochrome P450 homologue identified as the fumonisin gene *cpm1*.  
366 Even though *F. bulbicola* is a fumonisin C producer, the specific strain was identified as a non-producer  
367 (Brown and Proctor 2016). To investigate possible gaps in the genome assembly near the gene cluster, we  
368 searched the *F. bulbicola* genome for additional fumonisin genes. We analyzed homology at the  
369 nucleotide and amino acid level between *F. bulbicola* and the *F. oxysporum* strain RFC O-1890. RFC O-  
370 1890 is a fumonisin C producer and the most closely related available strain to *F. bulbicola*  
371 (Supplementary Table S5) (Proctor et al. 2008). We identified fumonisin cluster elements on 4 different *F.*  
372 *bulbicola* scaffolds with the exception of *FUM11* and *FUM17*.

373 We found additional evidence for the SM53 core cluster in distantly related fungi including  
374 *Metarhizium*, *Aspergillus* and *Zymoseptoria*. The cluster variant identified in the entomopathogenic  
375 fungus *M. anisopliae* was identified as a Mapks12 cluster (Sbaraini, et al. 2016). Although, the full cluster

376 size in *M. anisopliae* is still unknown, transcriptomic data showed expression of the gene encoding the  
377 PKS and adjacent genes in culture media (Sbaraini et al. 2016). In the wheat pathogen *Z. tritici*, the core  
378 gene set is forming a larger functional cluster and transcriptomic data shows coordinated upregulation, and  
379 high expression upon infection of wheat (Palma-Guerrero et al. 2016). Phylogenetic analyses of the  
380 backbone gene encoding a PKS showed broad congruence with the species tree consisted with long-term  
381 maintenance despite widespread losses in other species (Supplementary Figure S3). The highly conserved  
382 core cluster segment may constitute a functional cluster because it encodes a typical complement of  
383 cluster functions including a PKS, a cytochrome P450, a dehydrogenase, a methyltransferase, a  
384 transcription factor and a major facilitator superfamily transporter.

385

#### 386 **Transposable elements associated with gene cluster rearrangements**

387 We found evidence for the gene cluster SM48 in four different species of the FGSC (*F.*  
388 *cortaderiae*, *F. austroamericanum*, *F. meridionale* and *F. asiaticum*). In *F. graminearum* s.s., the PKS  
389 backbone gene is absent. However, we found evidence for five additional genes of SM48 in four different  
390 chromosomal locations and two different chromosomes (Figure 7). A gene encoding a homeobox-like  
391 domain protein, a transporter gene and the flanking genes clustered together on chromosome 2, but in two  
392 different loci at approximately 60 kb and 50 kb from each other, respectively. The gene encoding the  
393 glycosyl hydrolase, which is next to the backbone gene encoding the PKS in the canonical SM48 gene  
394 cluster configuration, was found as an individual gene in the subtelomeric region of chromosome 4. *F.*  
395 *avenaceum* is the only analyzed species outside the FGSC that shared the PKS gene (Figure 7).  
396 Interestingly, the SM48 gene cluster contained a series of transposable elements integrated either next to  
397 the gene encoding the PKS and/or the gene encoding the glycosyl hydrolase. Furthermore, a phylogenetic  
398 analysis showed a patchy taxonomic distribution of homologues across the *Fusarium* genus  
399 (Supplementary Table S6). The gene cluster SM48 was most likely vertically inherited by the FGSC  
400 because both *F. avenaceum* and *F. culmorum* showed rearranged configurations compared to FGSC  
401 species. Disrupted cluster variants are present in the clade formed by *F. graminearum* s.s., *F. boothii*, *F.*



402 *louisianense* and *F. gerlachii*. The high density of transposable elements might have facilitated the  
403 rearrangement of the gene cluster.

404

#### 405 **Transposable elements families in FGSC**

406 Several gene clusters of category 2 and 3 (SM46, SM48, SM48 and SM54; Figure 2), which  
407 showed various levels of reconfigurations were flanked by transposable elements. To understand broadly  
408 how transposable elements may have contributed to gene cluster evolution, we analyzed the identity of  
409 transposable elements across the genomes and in close association with gene clusters. We found overall  
410 no difference in transposable element density in proximity to gene clusters compared to the rest of the  
411 genome with the exception of the *F. asiaticum* strain FasiR (Supplementary Figure S4). FasiR showed  
412 about twice the transposable element density in proximity to clusters (9.9%) compared to genome-wide  
413 average (4.1%). Next, we analyzed the frequency of individual transposable element families within 10 kb  
414 of gene clusters and compared this to the frequency in all 10 kb windows across the genomes of the FGSC  
415 (Figure 8A). We found a series of transposable element families that were more frequent in proximity to  
416 gene clusters (Figure 8B). The most abundant elements in the genomes of the FGSC are the unclassified  
417 elements 3-family-62 (mean frequency of 0.147 per 10 kb window) followed by 2-family-17 (mean  
418 frequency of 0.124). In proximity to SM gene clusters, the frequency of the 2-family-17 was higher than  
419 3-family-62 in 54% of the strains, with an overall mean of 0.174 and 0.160, respectively. The element 4-  
420 family-882, which is enriched in the clade comprising *F. graminearum* s.s, *F. gerlachii*, *F. boothi* and *F.*  
421 *louisianense*, as well as the strain *F. cortaderiae*, is seven times more frequent near SM gene clusters  
422 compared to the whole genome (FgramR; Figure 8B).

423

424

## 425 **Discussion**

426

427 We assembled and analyzed a comprehensive set of genomes representative of the FGSC  
428 diversity. Our phylogenomic analyses corroborated previous multilocus studies and refined our  
429 understanding of the evolutionary relationships within the complex (O'Donnel et al, 2004; Aoki et al.  
430 2012). The recent speciation among members of the FGSC led to differentiation in host range, genome  
431 size, gene and transposable element content. Our analyses of SM gene clusters within the FGSC revealed  
432 more complexity than previously reported (Walkowiak et al. 2016). Individual gene clusters underwent  
433 independent gene losses, sequence rearrangements associated with transposable elements and multiple  
434 horizontal transfer events, leading to presence/absence polymorphism and chemical diversity within the  
435 FGSC.

436

### 437 **A diverse SM gene cluster pangenome of the FGSC**

438 We performed pangenome analyses of eight species of FGSC (11 isolates) to exhaustively  
439 characterize the presence of known and unknown SM gene clusters. The emergence of the FGSC was  
440 accompanied by the loss and rearrangement of several SM gene clusters. The most recent common  
441 ancestor with other members of the *Fusarium* clade likely carried more SM gene clusters. The recently  
442 lost clusters may underlie the adaptation to wheat as a primary host. Among the fully conserved gene  
443 clusters within the FGSC, we found clusters underlying the production of siderophores including  
444 triacetylfusarin and ferricrocin that facilitate iron acquisition (Charlang et al. 1981). We also found  
445 conserved clusters underlying the production of virulence factors, *e.g.* gramillin on maize (Bahadoor et al.  
446 2018). The conservation likely reflects the essential functions of these metabolites in the life cycle of the  
447 fungi. The SM gene clusters not fixed within the FGSC spanned a surprisingly broad number of types  
448 including TPS, NRPS, NRPS-TPS, and NRPS-PKS. Segregating gene clusters may reflect adaptation to  
449 niches specific to a subset of the FGSC. Such adaptation may explain the conservation of the apicidin

450 cluster in the *F. asiaticum* strain FasiR2 isolated from maize and the lack of the cluster in the strain FasiR  
451 isolated from barley (O'Donnel et al. 2000).

452  
453 How the environmental heterogeneity selects for diversity in SM gene clusters among closely  
454 related species is poorly understood, yet studies have found strong associations of SM gene clusters with  
455 different lifestyles and geographical distribution (Reynolds, et al. 2017, Wollenberg et al. 2018). The  
456 fusaristatin A gene cluster, thought to be missing in *F. pseudograminearum* (but present in FGSC), was  
457 recently found to be functional in a Western Australian population of *F. pseudograminearum* (Wollenberg  
458 et al. 2018). In FGSC, trichothecenes are key adaptations to exploit the host. Different forms of  
459 trichothecenes (*i.e.* deoxynivalenol, 3-acetyldeoxynivalenol, 15-acetyldeoxynivalenol and nivalenol  
460 chemotypes) are segregating in pathogen populations due to balancing selection (Ward et al. 2002). The  
461 trichothecene polymorphism is likely adaptive with the role in pathogenesis depending both on the crop  
462 host (Desjardins et al. 1992; Proctor et al. 2002; Cuzick et al. 2008) and the specific trichothecene  
463 produced (Carter et al. 2002, Ponts et al. 2009; Spolti et al. 2012). For example, nivalenol production is  
464 associated with pathogenicity on maize and deoxynivalenol is essential to Fusarium head blight in wheat  
465 spikelets but seems to play no role for pathogenicity on maize (Maier et al. 2006). Both toxins play no  
466 role in pathogenicity on barley. A variable pangenome of metabolic capacity maintained among members  
467 of the FGSC may, hence, also serve as a reservoir for adaptive introgression among species.

468

#### 469 **Mechanisms generating chemical diversity in *Fusarium***

470 Our study revealed a complex set of mechanisms underlying SM gene cluster diversity in FGSC.  
471 We found that multiple independent losses are a key factor generating extant cluster diversity within the  
472 FGSC and *Fusarium*. The SM43 (guaia,6-10(14)-diene) and the apicidin clusters were lost multiple times  
473 within *Fusarium* and in different lineages of the FGSC. Independent losses are frequently associated with  
474 the evolutionary trajectory of SM gene clusters (Patron et al. 2007; Khaldi et al. 2008). The evolution of  
475 the galactose (GAL) cluster in yeasts was characterized by multiple independent losses and at least 11

476 times among the subphyla of *Saccharomycotina* and *Taphrinomycotina* (Riley et al. 2016). Similarly,  
477 Campbell et al. (2012) showed that the bikaverin gene cluster was repeatedly lost in the genus *Botrytis*  
478 after receiving the cluster horizontally from a putative *Fusarium* donor. A gene cluster loss is typically  
479 favored by either a decreased benefit to produce the metabolite or an increase in production costs (Rokas  
480 et al. 2018). Along these lines, the *black queen hypothesis* conveys the idea that the loss of a costly gene  
481 (cluster) can provide a selective advantage by conserving an organism's limited resources (Morris et al.  
482 2012). Such loss-of-function mutations (e.g. abolishing metabolite production) are viable in an  
483 environment where other organisms ensure the same function (Mas et al. 2016; Morris et al. 2012). The  
484 *black queen hypothesis* may at least partially explain the metabolite diversity and high level of cluster loss  
485 in the FGSC if different lineages and species frequently co-exist in the same environment or host.

486  
487 Horizontal gene transfer is an important source of gene cluster gain in fungi (Kaldhi et al. 2008;  
488 Khaldi and Wolfe, 2011; Slot and Rokas, 2011; Campbell et al. 2012; Slot and Rokas, 2012) and likely  
489 contributed to the FGSC gene cluster diversity. Here, we report an unusual case of multiple, independent  
490 horizontal transfer events involving an ancient transfer from bacteria and a more recent fungal donor. The  
491 horizontal transfer contributed to the formation of the SM54 gene cluster found in the strain *F.*  
492 *austroamericanum* (Faus154). Horizontal transfer events have been proposed as an important form of  
493 pathogenicity emergence. A gene cluster of *F. pseudograminearum* was most likely formed by three  
494 horizontally acquired genes from other pathogenic fungi. An additional gene of the cluster encoding an  
495 amidohydrolase was received from a plant-associated bacterial donor and associated with pathogenicity on  
496 wheat and barley (Gardiner et al. 2012). Similarly, the *Metarhizium* genus of entomopathogens acquired at  
497 least 18 genes by independent horizontal transfer events that contribute to insect cuticle degradation  
498 (Zhang et al. 2018).

499  
500 Our analyses revealed the SM53 gene cluster core segment that is conserved across distantly  
501 related genera. The core section underlies the formation of superclusters through the rearrangement with a

502 separate cluster and likely led to neofunctionalization. The backbone and adjacent genes in the conserved  
503 segment were found to be expressed in *M. anisopliae* in culture medium (Sbaraini et al. 2016). In the  
504 wheat pathogen *Z. tritici*, the core segment was associated with additional genes forming a larger cluster  
505 with coordinated upregulation upon host infection (Palma-Guerrero et al. 2016). A study in *A. fumigatus*  
506 identified a similar event, where the clusters underlying pseurotin and fumagillin production were  
507 rearranged to form a supercluster (Wiemann et al. 2013). Similar to the gene cluster SM53, the segments  
508 of the supercluster were conserved in *A. fischeri* and in the more distantly related species *M. robertsii*.  
509 Taxonomically widespread conserved gene cluster segments may represent functional but transitory gene  
510 cluster variants that can give rise to superclusters. Viable, transitory stages are an efficient route to evolve  
511 new metabolic capacity across fungi (Rokas et al. 2018, Lind et al. 2017).

512

### 513 **Transposable elements as drivers of gene cluster rearrangements**

514 Our analyses revealed that gene cluster gains and losses in the FGSC were associated to  
515 transposable elements. We found an enrichment in transposable elements adjacent or integrated within  
516 different clusters (*i.e.* SM1, SM21, SM48, SM53 and SM54). Our data strongly suggests that the cluster  
517 SM48 emerged within FGSC and suffered transposable element-associated chromosomal rearrangements  
518 in the *F. graminearum* s.s clade followed by functional loss. The SM53 pseudogenization and gene loss in  
519 the *F. austroamericanum* strain Faus154 was likewise caused by transposable elements insertions adjacent  
520 to the cluster. Transposable elements play an important role in the evolution, particularly related to  
521 virulence, of fungal pathogens (Gardiner et al. 2013; Sánchez-Vallet et al. 2018; Fouché et al. 2018).  
522 Transposable elements can induce gene cluster rearrangements due to non-homologous recombination  
523 among repeat copies (Boutanaev and Osbourne 2018), but also impact genome structure and function by  
524 causing gene inactivation, copy number variation, and expression polymorphism (Manning et al. 2013;  
525 Sánchez-Vallet et al. 2017; Krishnan et al. 2018). For example, flanking transposable elements likely  
526 caused transposition events of a specialized cluster in *A. fumigatus* (Lind et al. 2017). The enriched

527 transposable elements near gene clusters in FGSC genomes were likely overall an important driver of gene  
528 cluster loss, rearrangement, and neofunctionalization.

529  
530 Our study provides insights into the evolutionary origins of SM gene clusters in a complex of  
531 closely related species. The recency of speciation within the FGSC is reflected by the predominant  
532 number of conserved gene clusters. Nevertheless, the FGSC accumulated previously under-appreciated  
533 gene cluster diversity, which originated from a broad spectrum of mechanisms including parallel gene  
534 losses, rearrangements and horizontal acquisition. Independent losses within the complex were likely due  
535 to ecological drivers and strong selection. Hence, environmental heterogeneity may play an important role  
536 in gene cluster evolution (Rokas et al. 2018). Chromosomal rearrangements underlying cluster loss were  
537 often complex and were likely facilitated by transposable elements. At the same time, chromosomal  
538 rearrangements contributed to gene cluster neofunctionalization. The extant chemical diversity of FGSC  
539 highlights the importance of transitory stages in the evolution of specialized metabolism among very  
540 closely related species.

541

542

### 543 **Acknowledgments**

544 We thank Dr. Robert Proctor from the National Center for Agricultural Utilization Research  
545 (United States Department of Agriculture) for kindly providing the genomic sequences of *F. bulbicola*.  
546 This research was supported by FAPESP (Fundação de Amparo a Pesquisa do Estado de São Paulo) grant  
547 process 2017/22369-7 and 2016/04364-5. DC receives support from the Swiss National Science  
548 Foundation (grants 31003A\_173265 and IZCOZO\_177052).

549

550

### 551 **References**

552 Rambaut, A – Figtree, 2012. Available online at: <http://tree.bio.ed.ac.uk/software/figtree>

- 553
- 554 Altschul S et al. 1997. Gapped BLAST and PSI-BLAST: a new generation of protein database search  
555 programs. *Nucleic Acids Res.* 25:3389–3402. doi: 10.1093/nar/25.17.3389.
- 556 Andrews, S. 2010. FastQC: a quality control tool for high throughput sequence data. Available online at:  
557 <http://www.bioinformatics.babraham.ac.uk/projects/fastqc/>
- 558
- 559 Aoki T, Ward TJ, Kistler HC, O'Donnell K. 2012. Systematics, Phylogeny and Trichothecene Mycotoxin  
560 Potential of *Fusarium* Head Blight Cereal Pathogens. *Mycotoxins.* 62:91–102. doi: 10.2520/myco.62.91.
- 561 Bahadoor A et al. 2018. Gramillin A and B: Cyclic Lipopeptides Identified as the Nonribosomal  
562 Biosynthetic Products of *Fusarium graminearum*. *J. Am. Chem. Soc.* 140:16783–16791. doi:  
563 10.1021/jacs.8b10017.
- 564 Bankevich, A., et al. 2012. SPAdes: a new genome assembly algorithm and its applications to single-cell  
565 sequencing. *J. Comput. Biol.*, 19(5): 455-477.
- 566
- 567 Blin K et al. 2017. antiSMASH 4.0—improvements in chemistry prediction and gene cluster boundary  
568 identification. *Nucleic Acids Res.* 45:W36–W41. doi: 10.1093/nar/gkx319.
- 569 Boutanaev AM, Osbourn AE. 2018. Multigenome analysis implicates miniature inverted-repeat  
570 transposable elements ( MITEs ) in metabolic diversification in eudicots. *Proc. Natl. Acad. Sci. USA.* 1–9.  
571 doi: 10.1073/pnas.1721318115.
- 572 Brakhage AA. 2013. Regulation of fungal secondary metabolism. *Nat. Rev. Microbiol.* 11:21–32. doi:  
573 10.1038/nrmicro2916.
- 574 Brakhage, A.A. 1998. Molecular regulation of beta-lactam biosynthesis in filamentous fungi. *Microbiol.*  
575 *Mol. Rev.* 62:547–585.
- 576 Brown DW, Proctor RH. 2016. Insights into natural products biosynthesis from analysis of 490 polyketide  
577 synthases from *Fusarium*. *Fungal Genet. Biol.* 89:37–51. doi: 10.1016/J.FGB.2016.01.008.
- 578 Burkhardt I, et al. 2016. Mechanistic characterization of two sesquiterpene cyclases from the plant  
579 pathogen *Fusarium fujikuroi*. *Angew Chem.* 55:8748–8751
- 580 Camacho C et al. 2009. BLAST+: architecture and applications. *BMC Bioinformatics.* 10:421. doi:  
581 10.1186/1471-2105-10-421.

- 582 Campbell MA, Rokas A, Slot JC. 2012. Horizontal Transfer and Death of a Fungal Secondary Metabolic  
583 Gene Cluster. *Genome Biol. Evol.* 4:289–293. doi: 10.1093/gbe/evs011.
- 584 Carter JP et al. 2002. Variation in Pathogenicity Associated with the Genetic Diversity of *Fusarium*  
585 *graminearum*. *Eur. J. Plant Pathol.* 108:573–583. doi: 10.1023/A:1019921203161.
- 586
- 587 Charlang G, Ng B, Horowitz NH, Horowitz RM. 1981. Cellular and extracellular siderophores of  
588 *Aspergillus nidulans* and *Penicillium chrysogenum*. *Mol. Cell. Biol.* 1:94–100. doi: 10.1128/MCB.1.2.94.
- 589 Cuzick, A, Urban, M, Hammond□Kosack, K. 2008. *Fusarium graminearum* gene deletion mutants map1  
590 and tri5 reveal similarities and differences in the pathogenicity requirements to cause disease on  
591 *Arabidopsis* and wheat floral tissue. *New Phytologist*, 177(4): 990-1000.
- 592
- 593 Darkin-Rattray SJ et al. 1996. Apicidin: a novel antiprotozoal agent that inhibits parasite histone  
594 deacetylase. *Proc. Natl. Acad. Sci. U. S. A.* 93:13143–7. doi: 10.1073/PNAS.93.23.13143.
- 595 Desjardins, A. E. 2006. *Fusarium mycotoxins: chemistry, genetics, and biology*. American  
596 Phytopathological Society (APS Press).
- 597
- 598 Desjardins, AE, Hohn, TM, McCormick, SP. 1992. Effect of gene disruption of trichodiene synthase on  
599 the virulence of *Gibberella pulvicaris*. *Mol. Plant-Microbe Interact*, 5(2):4-222.
- 600
- 601 Fouché S, Plissonneau C, Croll D. 2018. The birth and death of effectors in rapidly evolving filamentous  
602 pathogen genomes. *Curr. Opin. Microbiol.* 46:34–42. doi: 10.1016/J.MIB.2018.01.020.
- 603
- 604 Gardiner DM et al. 2012. Comparative Pathogenomics Reveals Horizontally Acquired Novel Virulence  
605 Genes in Fungi Infecting Cereal Hosts Mitchell, AP, editor. *PLoS Pathog.* 8:e1002952. doi:  
606 10.1371/journal.ppat.1002952.
- 607
- 608 Gardiner DM, Kazan K, Manners JM. 2013. Cross-kingdom gene transfer facilitates the evolution of  
609 virulence in fungal pathogens. *Plant Sci.* 210:151–158. doi: 10.1016/J.PLANTSCI.2013.06.002.
- 610 Gurevich A, Saveliev V, Vyahhi N, Tesler G. 2013. QUAST: quality assessment tool for genome  
611 assemblies. *Bioinformatics.* 29:1072–1075. doi: 10.1093/bioinformatics/btt086.
- 612



- 613 Guy L, Roat Kultima J, Andersson SGE. 2010. genoPlotR: comparative gene and genome visualization in  
614 R. *Bioinformatics*. 26:2334–2335. doi: 10.1093/bioinformatics/btq413.
- 615 Hartmann FE, Sánchez-Vallet A, McDonald BA, Croll D. 2017. A fungal wheat pathogen evolved host  
616 specialization by extensive chromosomal rearrangements. *ISME J*. 11:1189–1204. doi:  
617 10.1038/ismej.2016.196.
- 618 Higgins DG, Sharp PM. 1988. CLUSTAL: a package for performing multiple sequence alignment on a  
619 microcomputer. *Gene*. 73:237–244. doi: 10.1016/0378-1119(88)90330-7.
- 620 Hoogendoorn K et al. 2018. Evolution and Diversity of Biosynthetic Gene Clusters in *Fusarium*. *Front.*  
621 *Microbiol*. 9:1158. doi: 10.3389/fmicb.2018.01158.
- 622 Jin J-M et al. 2010. Functional characterization and manipulation of the apicidin biosynthetic pathway in  
623 *Fusarium semitectum*. *Mol. Microbiol*. 76:456–466. doi: 10.1111/j.1365-2958.2010.07109.x.
- 624 Jones DT, Taylor WR, Thornton JM. 1992. The rapid generation of mutation data matrices from protein  
625 sequences. *Computer Applications in the Biosciences* 8: 275-282.
- 626 Jones P et al. 2014. InterProScan 5: genome-scale protein function classification. *Bioinformatics*.  
627 30:1236–1240. doi: 10.1093/bioinformatics/btu031.
- 628 Kall L, Krogh A, Sonnhammer ELL. 2007. Advantages of combined transmembrane topology and signal  
629 peptide prediction--the Phobius web server. *Nucleic Acids Res*. 35:W429–W432. doi:  
630 10.1093/nar/gkm256.
- 631 Katoh K, Rozewicki J, Yamada KD. 2017. MAFFT online service: multiple sequence alignment,  
632 interactive sequence choice and visualization. *Brief. Bioinform*. doi: 10.1093/bib/bbx108.
- 633 Keller NP, Turner G, Bennett JW. 2005. Fungal secondary metabolism — from biochemistry to genomics.  
634 *Nat. Rev. Microbiol*. 3:937–947. doi: 10.1038/nrmicro1286.
- 635 Khaldi N, Collemare J, Lebrun M-H, Wolfe KH. 2008. Evidence for horizontal transfer of a secondary  
636 metabolite gene cluster between fungi. *Genome Biol*. 9:R18. doi: 10.1186/gb-2008-9-1-r18.
- 637 Khaldi, N., & Wolfe, K. H. 2011. Evolutionary origins of the fumonisin secondary metabolite gene cluster  
638 in *Fusarium verticillioides* and *Aspergillus niger*. *Int J Evol Biol.*, 2011.
- 639 Krogh A, Larsson B, von Heijne G, Sonnhammer EL. 2001. Predicting transmembrane protein topology  
640 with a hidden markov model: application to complete genomes. *J. Mol. Biol*. 305:567–580. doi:  
641 10.1006/JMBI.2000.4315.

- 642 Kumar S, Stecher G, Tamura K. 2016. MEGA7: Molecular Evolutionary Genetics Analysis Version 7.0  
643 for Bigger Datasets. *Mol. Biol. Evol.* 33:1870–1874. doi: 10.1093/molbev/msw054.
- 644 Li L, Stoeckert CJ, Roos DS. 2003. OrthoMCL: identification of ortholog groups for eukaryotic genomes.  
645 *Genome Res.* 13:2178–89. doi: 10.1101/gr.1224503.
- 646 Lind AL et al. 2017. Drivers of genetic diversity in secondary metabolic gene clusters within a fungal  
647 species. *PLOS Biol.* 15:e2003583. doi: 10.1371/journal.pbio.2003583.
- 648 Maier FJ et al. 2006. Involvement of trichothecenes in fusarioses of wheat, barley and maize evaluated by  
649 gene disruption of the trichodiene synthase (Tri5) gene in three field isolates of different chemotype and  
650 virulence. *Mol. Plant Pathol.* 7:449–461. doi: 10.1111/j.1364-3703.2006.00351.x.
- 651 Mas A, Jamshidi S, Lagadeuc Y, Eveillard D, Vandenkoornhuyse P. 2016. Beyond the Black Queen  
652 Hypothesis. *ISME J.* 10:2085–2091. doi: 10.1038/ismej.2016.22.
- 653 Morgulis A et al. 2008. Database indexing for production MegaBLAST searches. *Bioinformatics.*  
654 24:1757–1764. doi: 10.1093/bioinformatics/btn322.
- 655 Morris JJ, Lenski RE, Zinser ER. 2012. The Black Queen Hypothesis: evolution of dependencies through  
656 adaptive gene loss. *MBio.* 3:e00036-12. doi: 10.1128/mBio.00036-12.
- 657 Niehaus E-M et al. 2014. Apicidin F: Characterization and Genetic Manipulation of a New Secondary  
658 Metabolite Gene Cluster in the Rice Pathogen *Fusarium fujikuroi*. *PLoS One.* 9:e103336. doi:  
659 10.1371/journal.pone.0103336.
- 660 Nosanchuk JD, Casadevall A. 2006. Impact of melanin on microbial virulence and clinical resistance to  
661 antimicrobial compounds. *Antimicrob. Agents Chemother.* 50:3519–28. doi: 10.1128/AAC.00545-06.
- 662 O'Donnell K, Kistler HC, Tacke BK, Casper HH. 2000. Gene genealogies reveal global phylogeographic  
663 structure and reproductive isolation among lineages of *Fusarium graminearum*, the fungus causing wheat  
664 scab. *Proc. Natl. Acad. Sci U.S.A.* 97:7905–7910. doi: 10.1073/pnas.130193297.
- 665 O'Donnell K, Ward TJ, Geiser DM, Corby Kistler H, Aoki T. 2004. Genealogical concordance between  
666 the mating type locus and seven other nuclear genes supports formal recognition of nine phylogenetically  
667 distinct species within the *Fusarium graminearum* clade. *Fungal Genet. Biol.* 41:600–623. doi:  
668 10.1016/J.FGB.2004.03.003.
- 669 Osbourn, A. 2010. Secondary metabolic gene clusters: evolutionary toolkits for chemical innovation.  
670 *Trends in Genetics*, 26(10): 449-457.

- 671
- 672 Palma-Guerrero J et al. 2016. Comparative transcriptomic analyses of *Zymoseptoria tritici* strains show  
673 complex lifestyle transitions and intraspecific variability in transcription profiles. *Mol. Plant Pathol.*  
674 17:845–859. doi: 10.1111/mpp.12333.
- 675 Patron NJ et al. 2007. Origin and distribution of epipolythiodioxopiperazine (ETP) gene clusters in  
676 filamentous ascomycetes. *BMC Evol. Biol.* 7:174. doi: 10.1186/1471-2148-7-174.
- 677 Petersen TN, Brunak S, von Heijne G, Nielsen H. 2011. SignalP 4.0: discriminating signal peptides from  
678 transmembrane regions. *Nat. Methods.* 8:785–786. doi: 10.1038/nmeth.1701.
- 679 Ponts N et al. 2009. *Fusarium* response to oxidative stress by H<sub>2</sub>O<sub>2</sub> is trichothecene chemotype-  
680 dependent. *FEMS Microbiol. Lett.* 293:255–262. doi: 10.1111/j.1574-6968.2009.01521.x.
- 681 Proctor RH et al. 2018. Evolution of structural diversity of trichothecenes, a family of toxins produced by  
682 plant pathogenic and entomopathogenic fungi. *PLOS Pathog.* 14:e1006946. doi:  
683 10.1371/journal.ppat.1006946.
- 684 Proctor RH, Busman M, Seo J-A, Lee YW, Plattner RD. 2008. A fumonisin biosynthetic gene cluster in  
685 *Fusarium oxysporum* strain O-1890 and the genetic basis for B versus C fumonisin production. *Fungal*  
686 *Genet. Biol.* 45:1016–1026. doi: 10.1016/J.FGB.2008.02.004.
- 687 Proctor RHH et al. 2002. Genetic analysis of the role of trichothecene and fumonisin mycotoxins in the  
688 virulence of *Fusarium*. *Eur. J. Plant Pathol.* 108:691–698. doi: 10.1023/A:1020637832371.
- 689 Puri KD, Zhong S. 2010. The 3ADON Population of *Fusarium graminearum* Found in North Dakota Is  
690 More Aggressive and Produces a Higher Level of DON than the Prevalent 15ADON Population in Spring  
691 Wheat. *Phytopathology.* 100:1007–1014. doi: 10.1094/PHYTO-12-09-0332.
- 692 Quinlan AR, Hall IM. 2010. BEDTools: a flexible suite of utilities for comparing genomic features.  
693 *Bioinformatics.* 26:841–842. doi: 10.1093/bioinformatics/btq033.
- 694 Reynolds HT et al. 2017. Differential Retention of Gene Functions in a Secondary Metabolite Cluster.  
695 *Mol. Biol. Evol.* 34:2002–2015. doi: 10.1093/molbev/msx145.
- 696 Reynolds HT et al. 2018. Horizontal gene cluster transfer increased hallucinogenic mushroom diversity.  
697 *Evol. Lett.* 2:88–101. doi: 10.1002/evl3.42.
- 698 Riley R et al. 2016. Comparative genomics of biotechnologically important yeasts. *Proc. Natl. Acad. Sci.*  
699 *U. S. A.* 113:9882–7. doi: 10.1073/pnas.1603941113.

- 700 Rokas A, Wisecaver JH, Lind AL. 2018. The birth, evolution and death of metabolic gene clusters in  
701 fungi. *Nat. Rev. Microbiol.* 1. doi: 10.1038/s41579-018-0075-3.
- 702 Sánchez-Vallet A et al. 2018. The Genome Biology of Effector Gene Evolution in Filamentous Plant  
703 Pathogens. *Annu. Rev. Phytopathol.* 56:21–40. doi: 10.1146/annurev-phyto-080516-035303.
- 704 Sbaraini N et al. 2016. Secondary metabolite gene clusters in the entomopathogen fungus *Metarhizium*  
705 *anisopliae*: genome identification and patterns of expression in a cuticle infection model. *BMC Genomics.*  
706 17:736. doi: 10.1186/s12864-016-3067-6.
- 707 Sieber CMK et al. 2014. The *Fusarium graminearum* Genome Reveals More Secondary Metabolite Gene  
708 Clusters and Hints of Horizontal Gene Transfer. *PLoS One.* 9:e110311. doi:  
709 10.1371/journal.pone.0110311.
- 710 Slot JC, Rokas A. 2010. Multiple GAL pathway gene clusters evolved independently and by different  
711 mechanisms in fungi. *Proc. Natl. Acad. Sci. U. S. A.* 107:10136–41. doi: 10.1073/pnas.0914418107.
- 712 Slot JC, Rokas A. 2011. Horizontal Transfer of a Large and Highly Toxic Secondary Metabolic Gene  
713 Cluster between Fungi. *Curr. Biol.* 21:134–139. doi: 10.1016/J.CUB.2010.12.020.
- 714 Smit, A, Hubley, R. 2008. 2010 RepeatModeler Open-1.0. Available online at:  
715 <http://www.repeatmasker.org/RepeatModeler/>  
716
- 717 Sonnhammer ELL, Durbin R. 1995. A dot-matrix program with dynamic threshold control suited for  
718 genomic DNA and protein sequence analysis. *Gene.* 167:GC1–GC10. doi: 10.1016/0378-1119(95)00714-  
719 8.
- 720 Sperschneider J, Dodds PN, Gardiner DM, Singh KB, Taylor JM. 2018. Improved prediction of fungal  
721 effector proteins from secretomes with EffectorP 2.0. *Mol. Plant Pathol.* 19:2094–2110. doi:  
722 10.1111/mpp.12682.
- 723 Spolti P, Barros NC, Gomes LB, dos Santos J, Del Ponte EM. 2012. Phenotypic and pathogenic traits of  
724 two species of the *Fusarium graminearum* complex possessing either 15-ADON or NIV genotype. *Eur. J.*  
725 *Plant Pathol.* 133:621–629. doi: 10.1007/s10658-012-9940-5.  
726
- 727 Smit, AFA, Hubley, R & Green, P. RepeatMasker Open-4.0. 2015. Available online in:  
728 <http://www.repeatmasker.org>.

- 729 Stamatakis A. 2014. RAxML version 8: a tool for phylogenetic analysis and post-analysis of large  
730 phylogenies. *Bioinformatics*. 30:1312–1313. doi: 10.1093/bioinformatics/btu033.
- 731 Stanke M, Morgenstern B. 2005. AUGUSTUS: a web server for gene prediction in eukaryotes that allows  
732 user-defined constraints. *Nucleic Acids Res*. 33:W465–W467. doi: 10.1093/nar/gki458.
- 733 Tralamazza SM, Bemvenuti RH, Zorzete P, Garcia FS, Corrêa B. 2016. Fungal diversity and natural  
734 occurrence of deoxynivalenol and zearalenone in freshly harvested wheat grains from Brazil. *Food Chem*.  
735 196:445–456. doi: 10.1016/j.foodchem.2015.09.063.
- 736 van der Lee T, Zhang H, van Diepeningen A, Waalwijk C. 2015. Biogeography of *Fusarium*  
737 *graminearum* species complex and chemotypes: a review. *Food Addit. Contam. - Part A Chem. Anal.*  
738 *Control. Expo. Risk Assess*. 32:453–460. doi: 10.1080/19440049.2014.984244.
- 739 Walkowiak S, Rowland O, Rodrigue N, Subramaniam R. 2016. Whole genome sequencing and  
740 comparative genomics of closely related *Fusarium* Head Blight fungi: *Fusarium graminearum*, *F.*  
741 *meridionale* and *F. asiaticum*. *BMC Genomics*. 17:1014. doi: 10.1186/s12864-016-3371-1.
- 742 Ward TJ et al. 2008. An adaptive evolutionary shift in *Fusarium* head blight pathogen populations is  
743 driving the rapid spread of more toxigenic *Fusarium graminearum* in North America. *Fungal Genet. Biol*.  
744 45:473–84. doi: 10.1016/j.fgb.2007.10.003.
- 745 Ward TJ, Bielawski JP, Kistler HC, Sullivan E, O’Donnell K. 2002. Ancestral polymorphism and adaptive  
746 evolution in the trichothecene mycotoxin gene cluster of phytopathogenic *Fusarium*. *Proc. Natl. Acad.*  
747 *Sci. U. S. A*. 99:9278–83. doi: 10.1073/pnas.142307199.
- 748 Waterhouse RM et al. 2018. BUSCO Applications from Quality Assessments to Gene Prediction and  
749 Phylogenomics. *Mol. Biol. Evol*. 35:543–548. doi: 10.1093/molbev/msx319.
- 750 Wickham H. (2016). *ggplot2: elegant graphics for data analysis*. Springer.  
751
- 752 Wiemann P et al. 2013. Prototype of an intertwined secondary-metabolite supercluster. *Proc. Natl. Acad.*  
753 *Sci U.S.A*. 110:17065–17070. doi: 10.1073/pnas.1313258110.
- 754 Wisecaver JH, Slot JC, Rokas A. 2014. The Evolution of Fungal Metabolic Pathways. *PLoS Genet*.  
755 10:e1004816. doi: 10.1371/journal.pgen.1004816.
- 756 Wollenberg RD et al. 2018. There it is! *Fusarium pseudograminearum* did not lose the fusaristatin gene  
757 cluster after all. *Fungal Biol*. doi: 10.1016/J.FUNBIO.2018.10.004.

- 758 Wong S, Wolfe KH. 2005. Birth of a metabolic gene cluster in yeast by adaptive gene relocation. *Nat.*  
759 *Genet.* 37:777–782. doi: 10.1038/ng1584.
- 760 Zhang C, Sayyari E, Mirarab S. 2017. ASTRAL-III: Increased Scalability and Impacts of Contracting  
761 Low Support Branches. In: *Springer, Cham* pp. 53–75. doi: 10.1007/978-3-319-67979-2\_4.
- 762 Zhang H et al. 2012. Population Analysis of the *Fusarium graminearum* Species Complex from Wheat in  
763 China Show a Shift to More Aggressive Isolates. *PLoS One.* 7:e31722. doi:  
764 10.1371/journal.pone.0031722.
- 765 Zhang Q et al. 2019. Horizontal gene transfer allowed the emergence of broad host range  
766 entomopathogens. *Proc. Natl. Acad. Sci U.S.A.* 116:7982–7989. doi: 10.1073/PNAS.1816430116.
- 767 Zhang Z, Schwartz S, Wagner L, Miller W. 2000. A Greedy Algorithm for Aligning DNA Sequences. *J.*  
768 *Comput. Biol.* 7:203–214. doi: 10.1089/10665270050081478.
- 769

770 **Figure legends**

771  
772 Figure 1. Phylogenomic tree of the *Fusarium graminearum* species complex (FGSC) and other *Fusarium*  
773 strains, inferred from a coalescence-based analysis of 4192 single-copy orthologues and bootstrap of 100  
774 replicates. *T. reesei* was used as an outgroup. Tree nodes without values have a bootstrap of 100%.  
775 Substrate/host information was retrieved from Aoki et al. (2012). \* *F. oxysporum* lineages are usually host  
776 specific. FFSC: *Fusarium fujikuroi* species complex. FSAMSC: *Fusarium sambucinum* species complex.

777  
778 Figure 2. Secondary metabolite gene cluster pangenome of the *Fusarium graminearum* species complex  
779 (FGSC) based on evidence for backbone genes. Squares with black lines in the heatmap correspond to  
780 genomes used for comparative genomic analyses: FgramR (SM1-SM45), FasiR2 (SM46), FasiR (SM47-  
781 SM52), Fcor153 (SM53) and Faus154 (SM54). The bar chart is identifying frequencies clusters types.  
782 Colored bars below the heatmap correspond to the cluster type. Black/grey bars correspond to the category  
783 conservation cluster table. PKS – polyketide synthase; NRPS – nonribosomal peptide synthetase; TPS –  
784 terpene synthase. FFSC: *Fusarium fujikuroi* species complex. FSAMSC: *Fusarium sambucinum* species  
785 complex

786  
787 Figure 3. Synteny plot of the SM46 (guaia-6,10-diene) gene cluster and heatmap of protein identity based  
788 on the *Fusarium graminearum* FgramR reference genome. Rectangles below the heatmap correspond to  
789 the genes shown in the synteny plot. Arrows of identical color correspond to homologous genes and  
790 identify the predicted protein function. TPS: terpene synthase; MFT: major facilitator superfamily  
791 transporter.

792  
793 Figure 4. Synteny plot of the SM46 apicidin metabolite gene cluster. Arrows of identical color correspond  
794 to homologous genes and identify the predicted protein function. \* *Fusarium fujikuroi* is an apicidin-F  
795 producer. Phylogenetic trees were constructed using maximum likelihood and the JTT matrix-based amino

796 acid model with 1000 bootstrap replicates. The species tree was based on the concatenated analysis of the  
797 EF-1 $\alpha$ , RBP1 and RPB2 genes. *Fusarium solani* was used as the outgroup. Grey boxes indicate the  
798 presence, independent loss and possible origin of the apicidin cluster. HGT: horizontal gene transfer. VT:  
799 vertical transmission.

800  
801 Figure 5. Synteny plot of the SM54 gene cluster. Arrows of identical color correspond to homologous  
802 genes and identify the predicted protein function. White arrows identify genes without a homolog in  
803 corresponding strain. Phylogenetic trees were built using maximum likelihood and the JTT matrix-based  
804 model with 1000 bootstrap replicates. The species tree was based on the concatenated genes EF-1 $\alpha$ , RPB1  
805 and RPB2. *Saccharomyces cerevisiae* was used as the outgroup.

806  
807 Figure 6. Synteny plot of the SM53 gene cluster. Arrows of identical color correspond to homologous  
808 genes and identify the predicted protein function. Light gray arrows correspond to genes lacking  
809 homology among analyzed strains. Light blue identifies the conserved core set of genes. Blue dotted lines  
810 in *Fusarium bulbicola* correspond to the fumonisin cluster adjacent to the core set and in *Zymoseptoria*  
811 *tritici* to the PKS5 gene cluster upregulated during infection in wheat. PKS: polyketide synthase; MFT:  
812 major facilitator superfamily transporter; TE: transposable element.

813  
814 Figure 7. Synteny plot of the SM48 gene cluster. Arrows of identical color correspond to homologous  
815 genes and identify the predicted protein function. Values adjacent to disrupted clusters define physical  
816 distances and grey bars below genes define to chromosomal locations. TPS: terpene synthase; MFT: major  
817 facilitator superfamily transporter; TE: transposable element.

818  
819 Figure 8. A - Heatmap with the most frequent transposable element families flanking FGSC gene clusters  
820 and the overall genome in 10 kb windows. B- Bar chart showing the ratio of the observed (SM gene



821 cluster) over the expected transposable elements (genome) in the *F. graminearum* reference genome  
822 (FgramR). Red dotted line marks the ratio of one representing no difference.

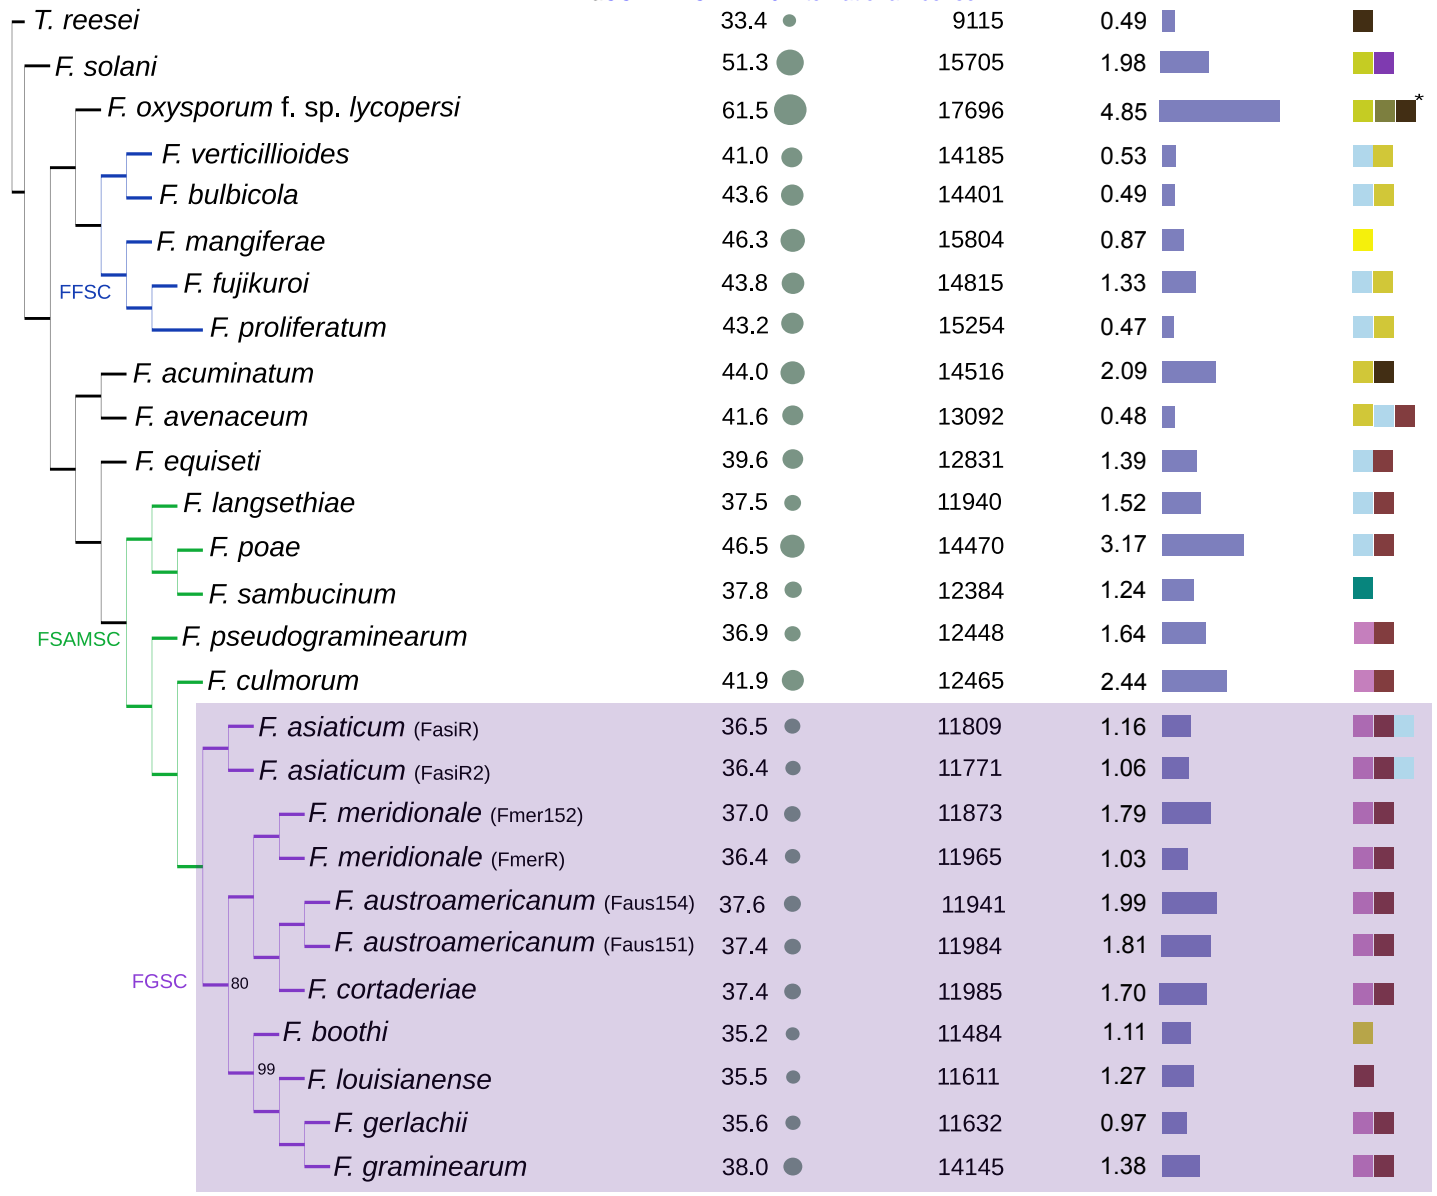

2.0

Barley Maize Potato Soil Vegetables  
Fruits Mango Rice Soy Wheat

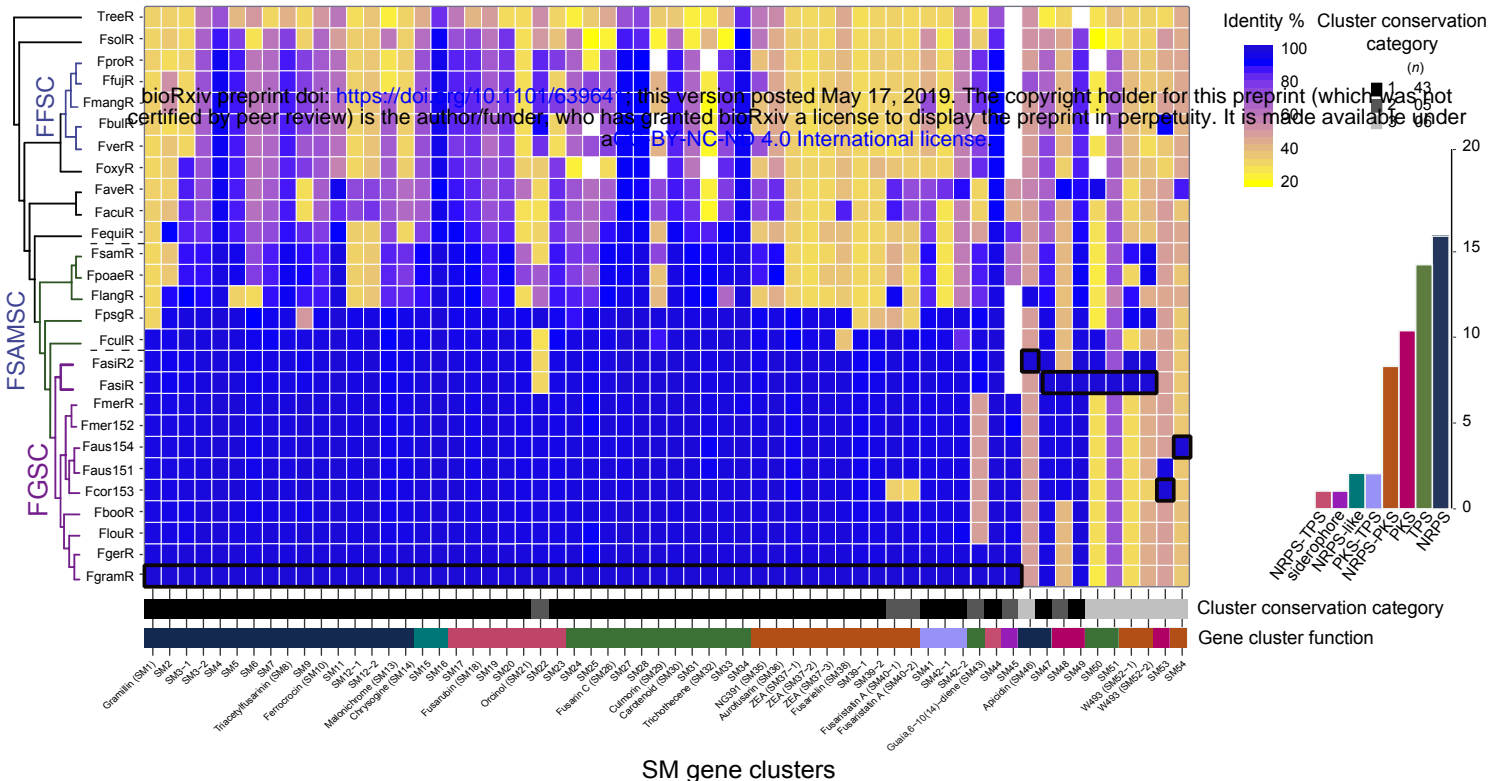

SM gene clusters

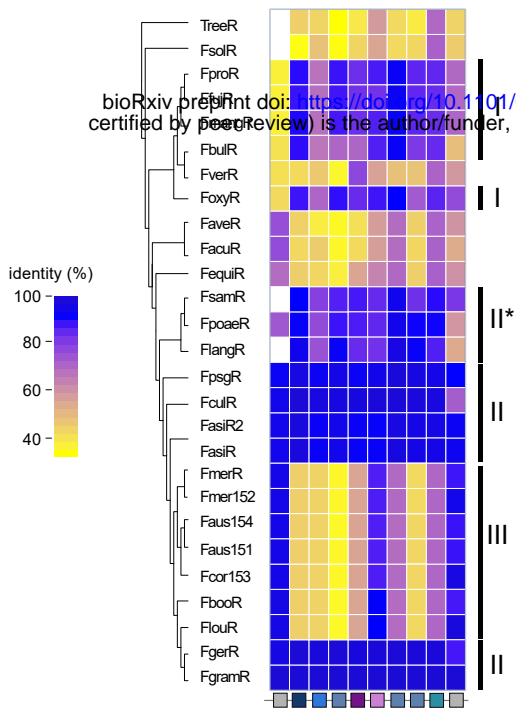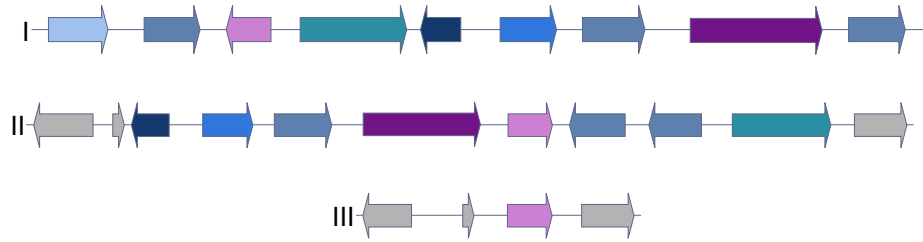

■ TPS    ■ ATPase    ■ transcription factor  
■ MFT    ■ cytochrome p450    ■ pyoverdine  
■ flanking genes

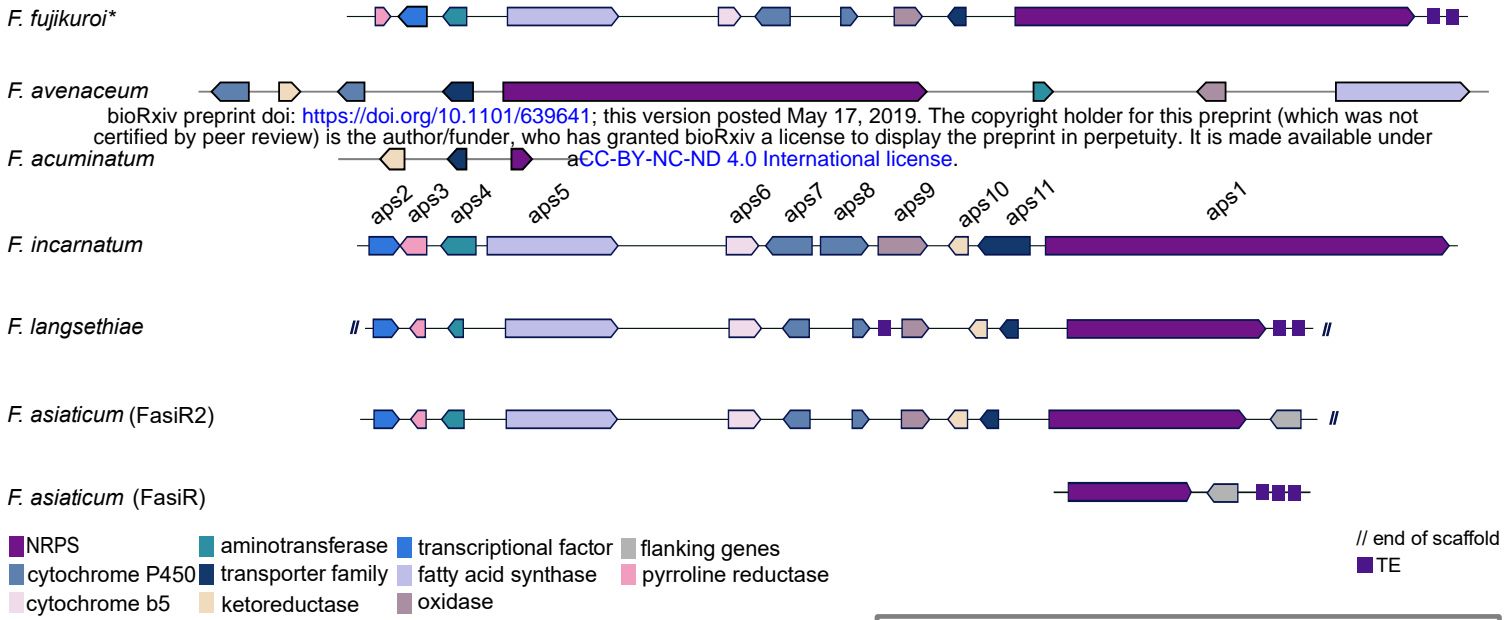

**species tree**

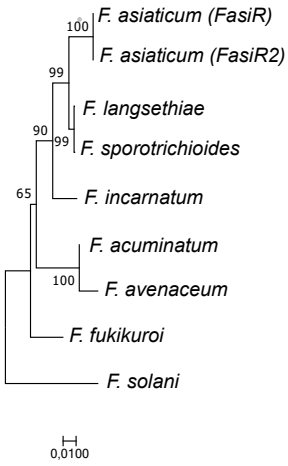

**concanetated tree (aps1, aps5, aps11)**

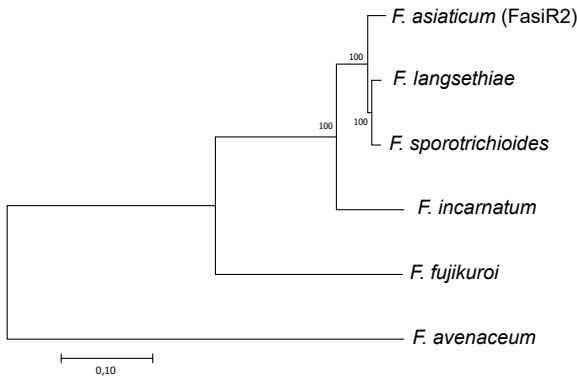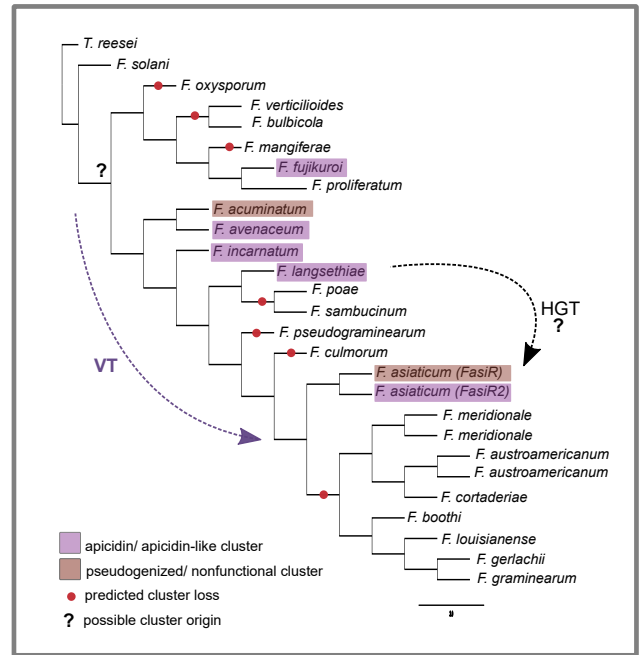

**aps10**

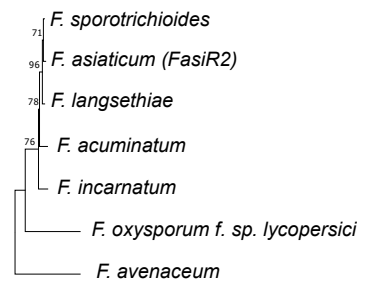

**aps1**

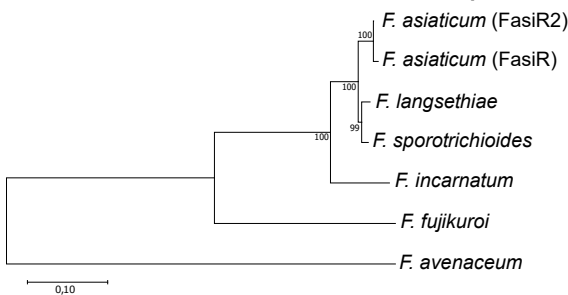

**aps5**

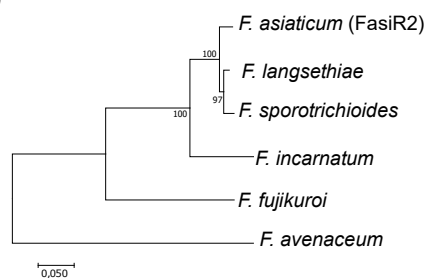

**aps11**

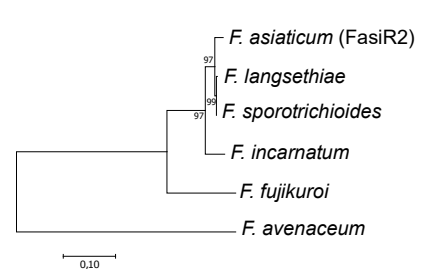

*F. austroamericanum* (Faus154)

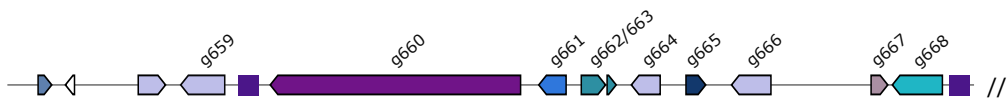

*F. avenaceum* bioRxiv preprint doi: <https://doi.org/10.1101/639641>; this version posted May 17, 2019. The copyright holder for this preprint (which was not certified by peer review) is the author/funder, who has granted bioRxiv a license to display the preprint in perpetuity. It is made available under aCC-BY-NC-ND 4.0 International license.

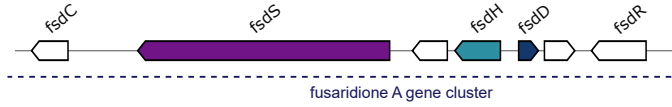

- PKS
- FAD/NAD(P)-binding domain superfamily
- cytochrome P450
- TE
- ankyrin repeats
- tyrosinase copper-binding domain
- methyltransferase
- // end of scaffold
- alcohol dehydrogenase
- putative necrosis-inducing factor

### species tree

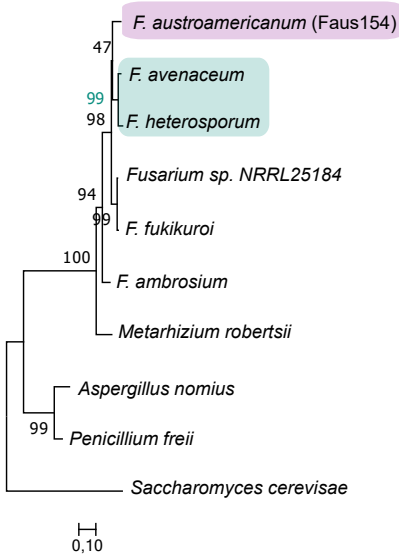

### g659

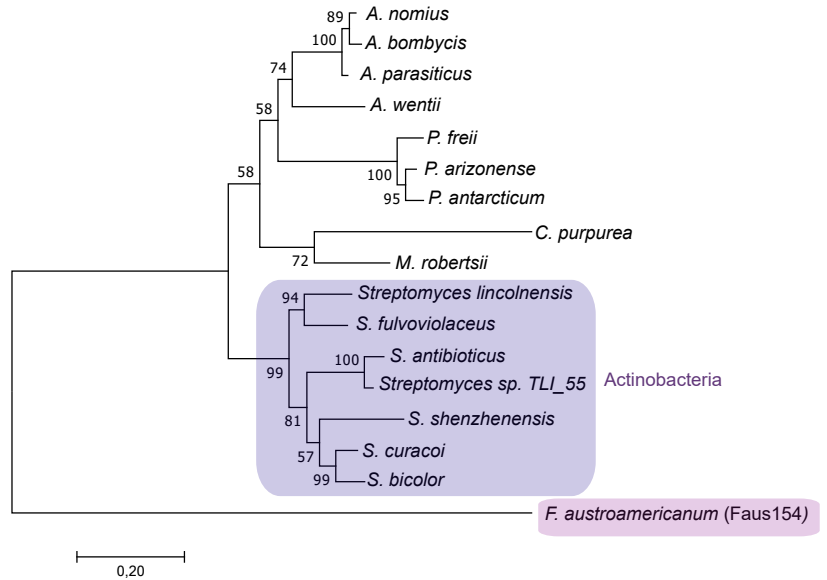

### g660

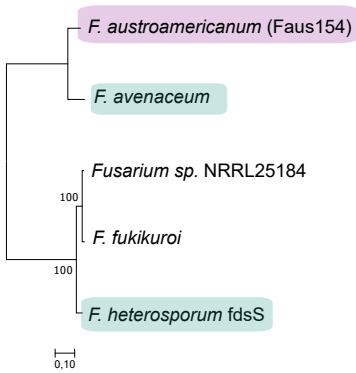

### g661

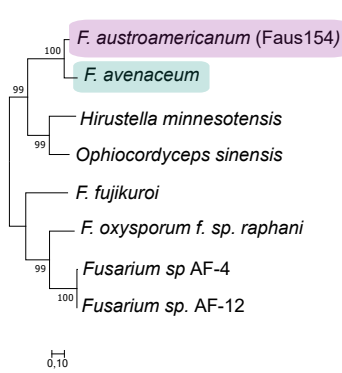

### g662/663

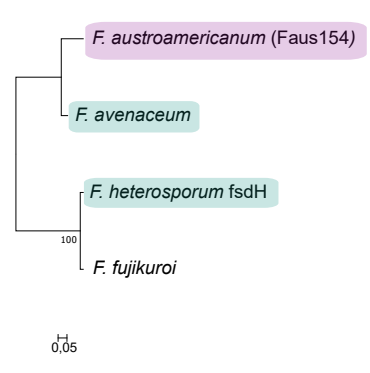

### g664

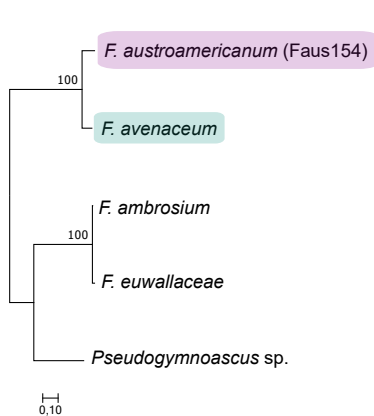

### g665

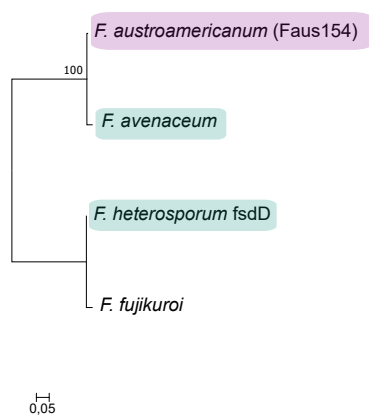

### g666

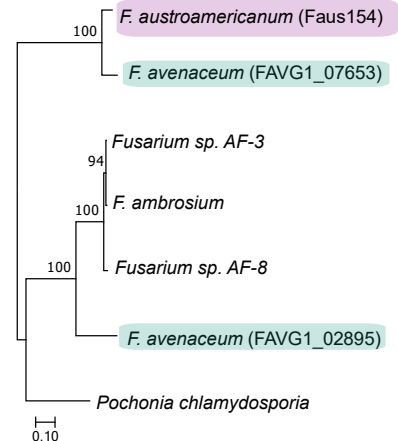

*F. cortaderiae*

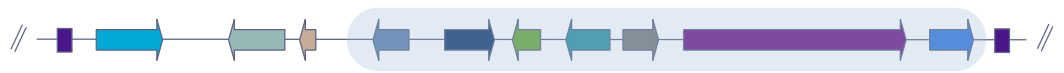

bioRxiv preprint doi: <https://doi.org/10.1101/639641>; this version posted May 17, 2019. The copyright holder for this preprint (which was not certified by peer review) is the author/funder, who has granted bioRxiv a license to display the preprint in perpetuity. It is made available under aCC-BY-NC-ND 4.0 International license.

*F. austroamericanum* (Faus154)

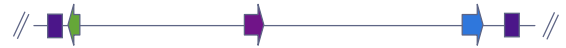

*F. bulbicola*

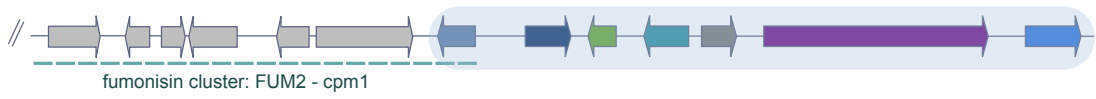

*Metarhizium anisopliae*

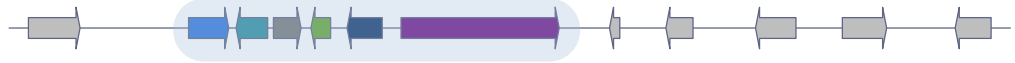

*Zymoseptoria tritici*

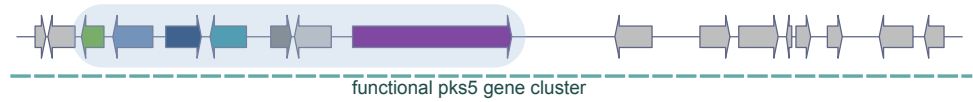

■ PKS   ■ aminotransferase   ■ transcription factor  
■ MFT   ■ cytochrome P450   ■ genes strain/genus specific

// end of scaffold  
■ TE

*F. avenaceum*

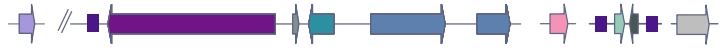

bioRxiv preprint doi: <https://doi.org/10.1101/639641>; this version posted May 17, 2019. The copyright holder for this preprint (which was not certified by peer review) is the author/funder, who has granted bioRxiv a license to display the preprint in perpetuity. It is made available under aCC-BY-NC-ND 4.0 International license.

*F. culmorum*

Chr1 Chr2

*F. austroamericanum* (Faus154)

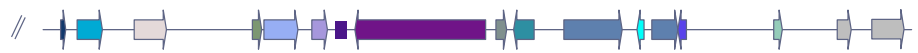

*F. austroamericanum* (Faus151)

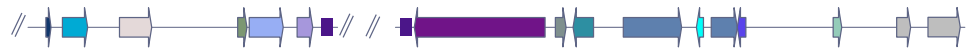

*F. cortaderiae*

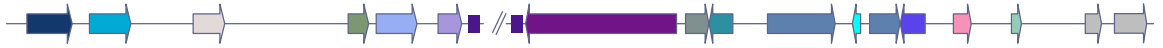

*F. graminearum*

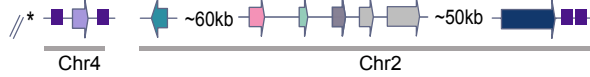

■ TPS   ■ homeobox-like   ■ transcription factor  
■ MFT   ■ cytochrome P450   ■ flanking genes  
■ glycosyl hydrolase

// end of scaffold  
// \* end of chromosome  
■ TE



**A**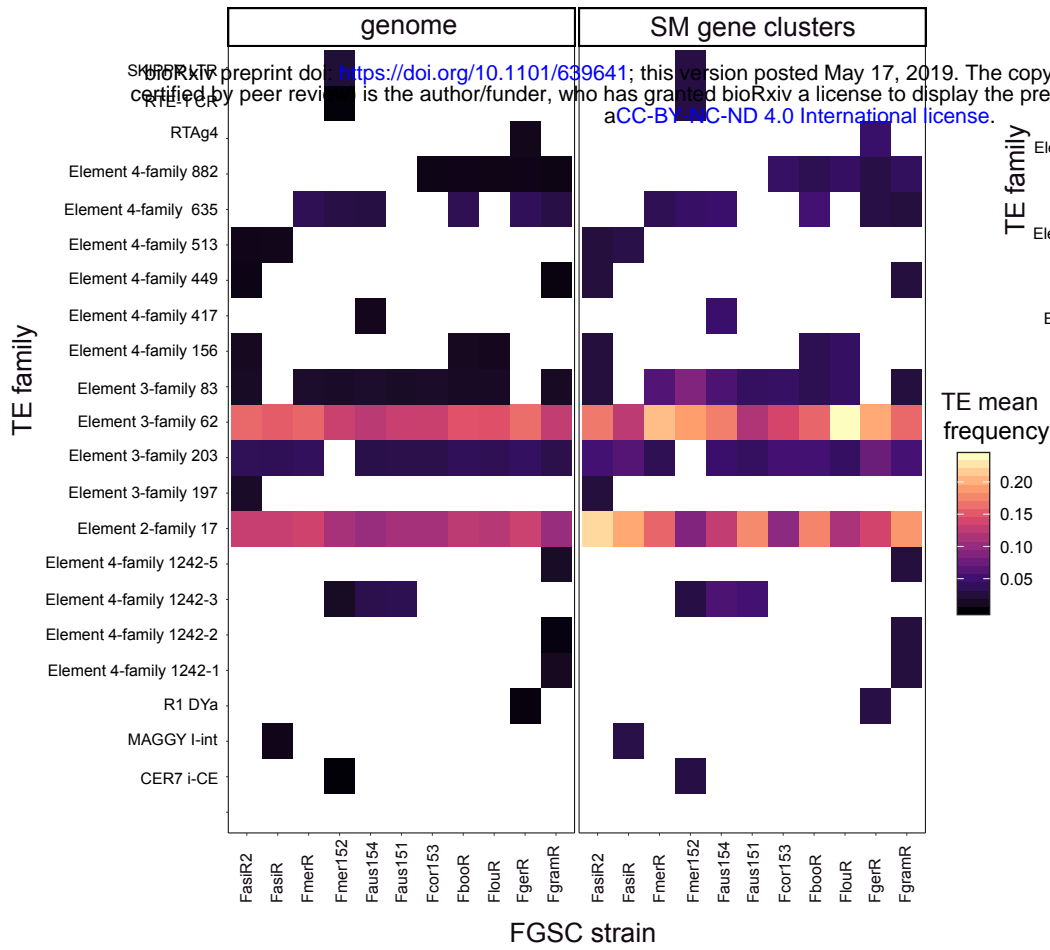**B**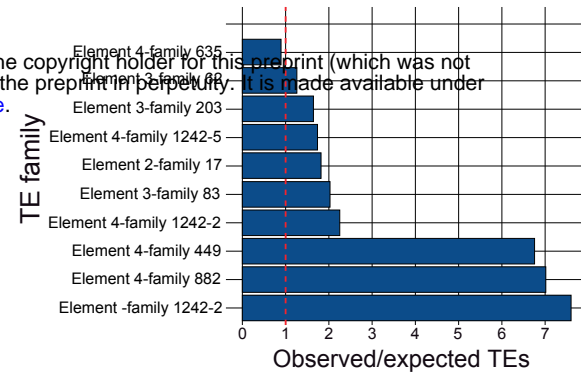

TE mean frequency

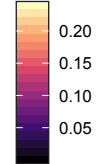

Source: https://www.biorxiv.org/content/10.1101/639641v1.full.pdf
